# Supplementary material for: Degradation of LMO2 in T cell leukaemia results in collateral breakdown of transcription complex partners and causes LMO2-dependent apoptosis
Source: eLife journal article supplement (doi:10.7554/elife.106699), 2025-08-06
Supplement: fig2-figsupp5-data1 [file Figure 1-figure supplement 5-source data 1.pdf › Figure 2—figure supplement 5-source data 1 Western blot data with label shows the longevity of responses of KOPT-K1 cells to single dose treatment./Figure 1-figure supplement 5-source data 1.pdf]

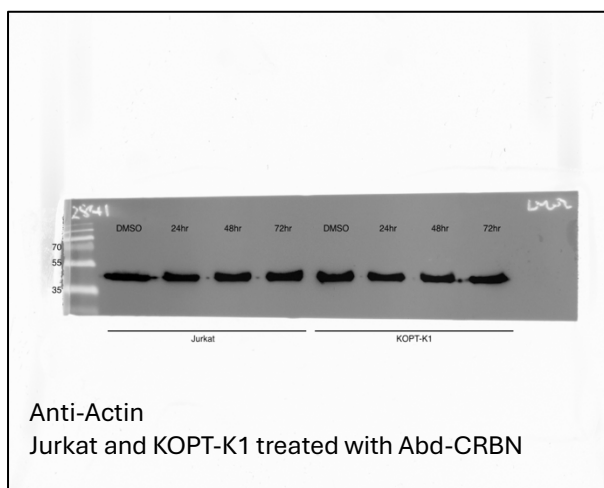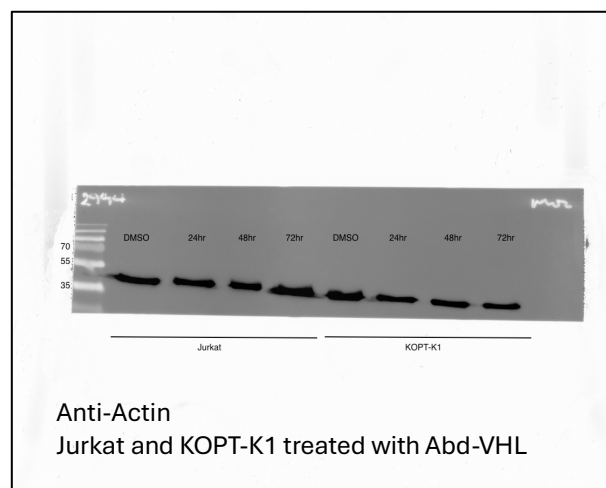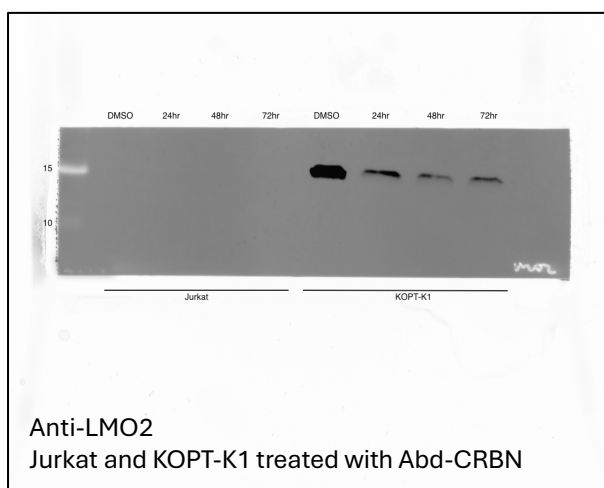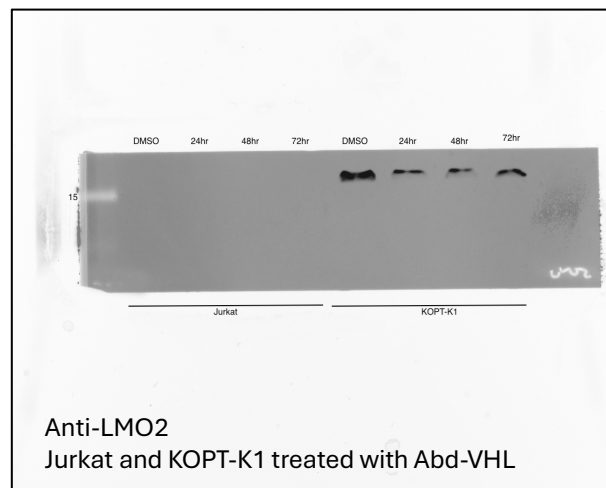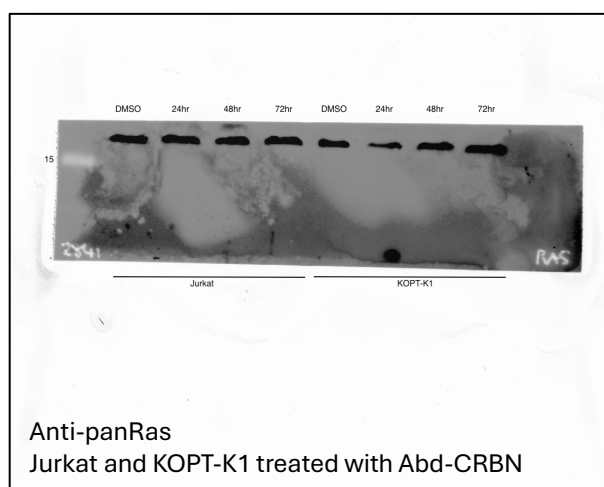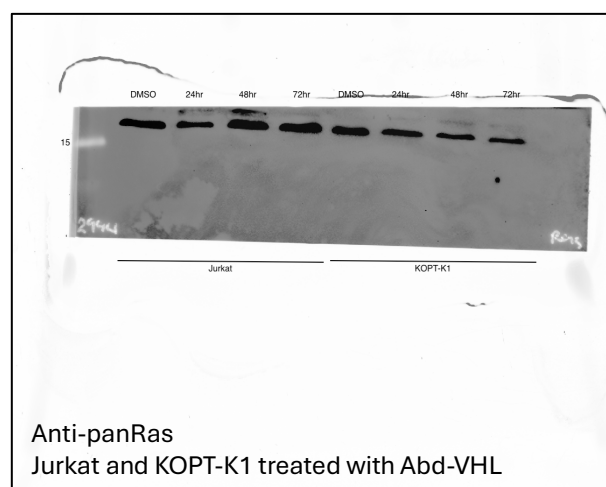

**Figure 2-figure supplement 5, Source Data 1.** Original membranes corresponding to Figure 2-figure supplement 5, panel A-B.
