# Supplementary material for: Degradation of LMO2 in T cell leukaemia results in collateral breakdown of transcription complex partners and causes LMO2-dependent apoptosis
Source: eLife journal article supplement (doi:10.7554/elife.106699), 2025-08-06
Supplement: fig2-figsupp6-data1 [file Figure 2-figure supplement 6-source data 1.pdf › Figure 2—figure supplement 6-source data 1 Western blot data with label shows LMO2 level of KOPT-K1 treated with Abd compounds and inhibitors./Figure 2-figure supplement 6-source data 1.pdf]

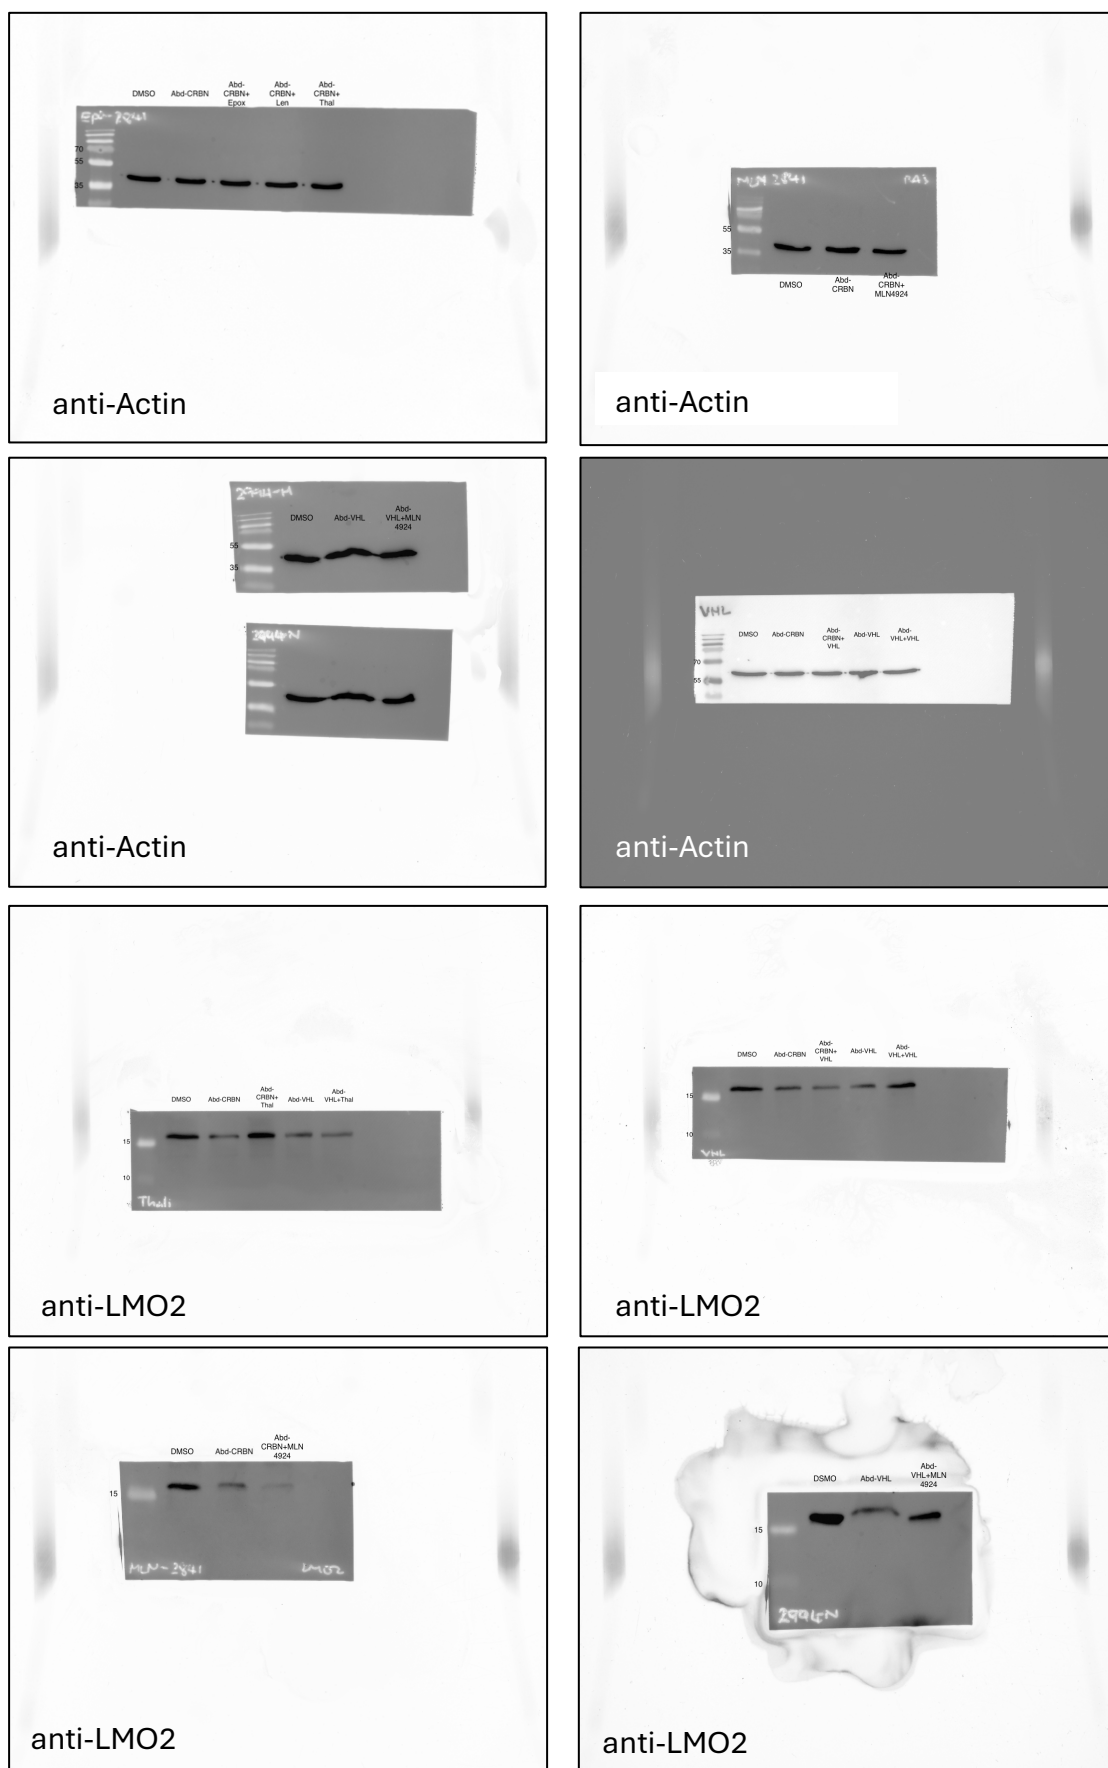

**Figure 2-figure supplement 6, Source Data 1.** Original membranes corresponding to Figure 2-figure supplement 6, panel A, C, E, J and K.
