# Supplementary material for: Degradation of LMO2 in T cell leukaemia results in collateral breakdown of transcription complex partners and causes LMO2-dependent apoptosis
Source: eLife journal article supplement (doi:10.7554/elife.106699), 2025-08-06
Supplement: fig3-data1 [file Figure 3—source data 1.pdf › Figure 3—source data 1 PDF files containing original western blots for Figure 3A, indicating the relevant bands and treatments./Figure 3—source data 1.pdf]

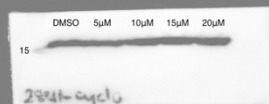

Cyclophilin-b in CCRF-CEM  
treated with Abd-CRBN

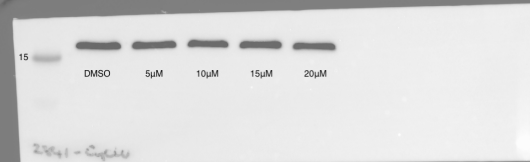

Cyclophilin-b in KOPT-K1  
treated with Abd-CRBN

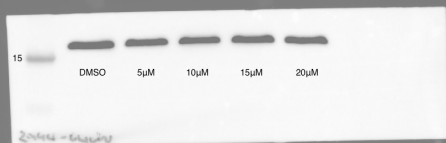

Cyclophilin-b in KOPT-K1  
treated with Abd-VHL

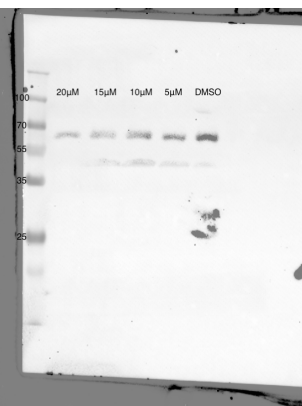

E47 in CCRF-CEM  
treated with Abd-CRBN

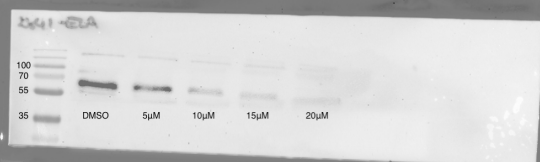

E47 in KOPT-K1  
treated with Abd-CRBN

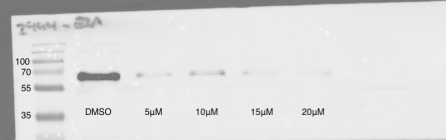

E47 in KOPT-K1  
treated with Abd-VHL

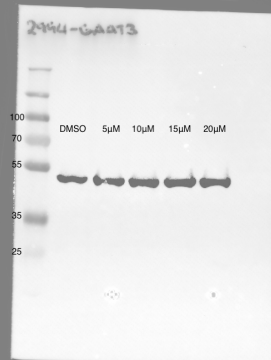

GATA3 in CCRF-CEM  
treated with Abd-CRBN

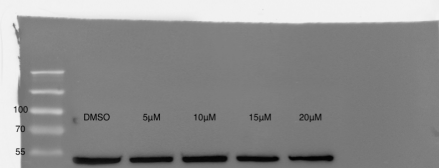

GATA3 in CCRF-CEM  
treated with Abd-VHL

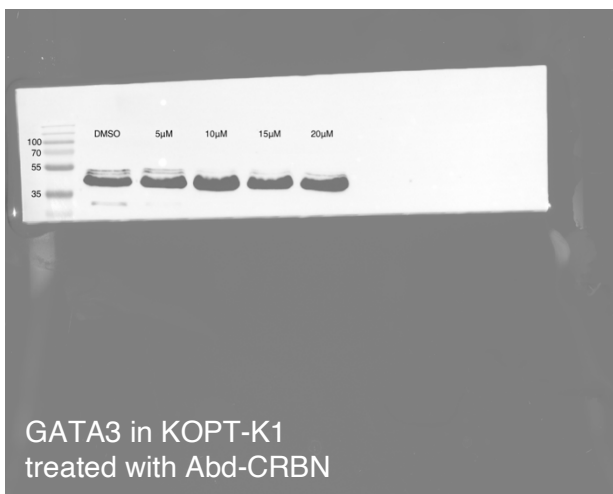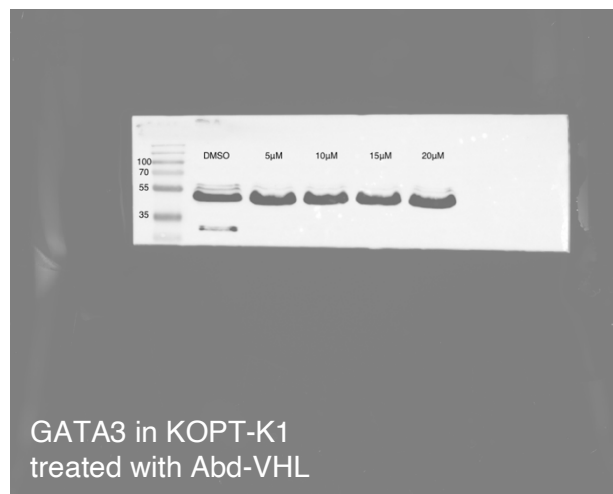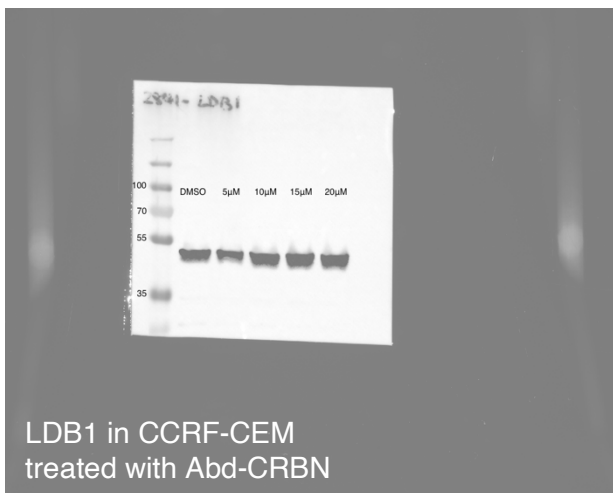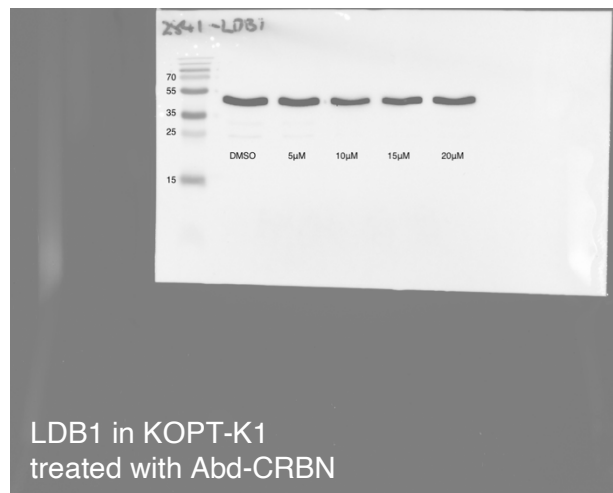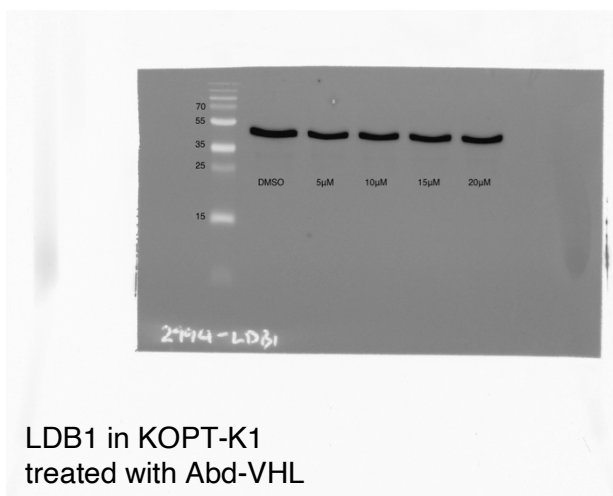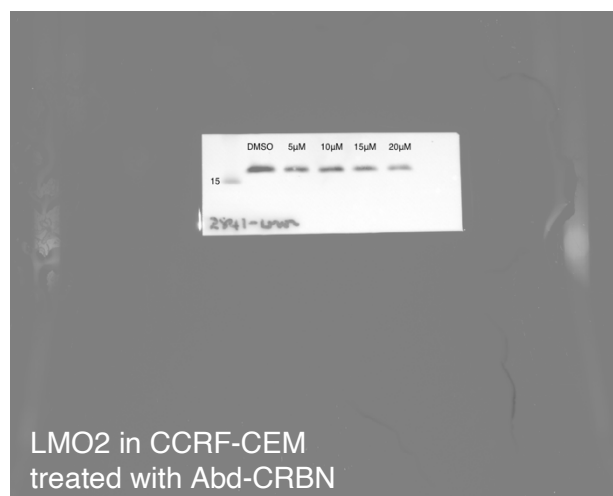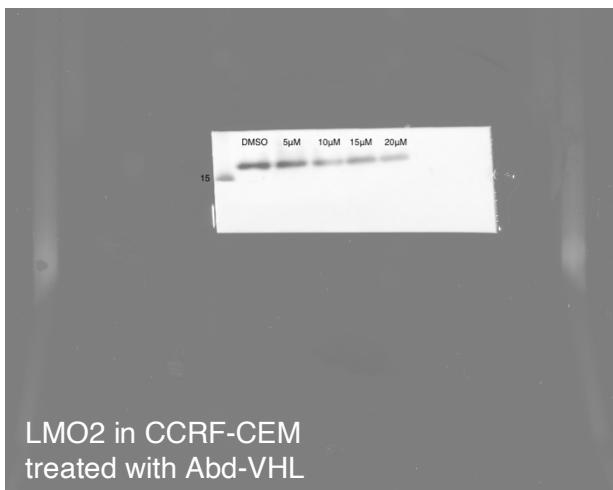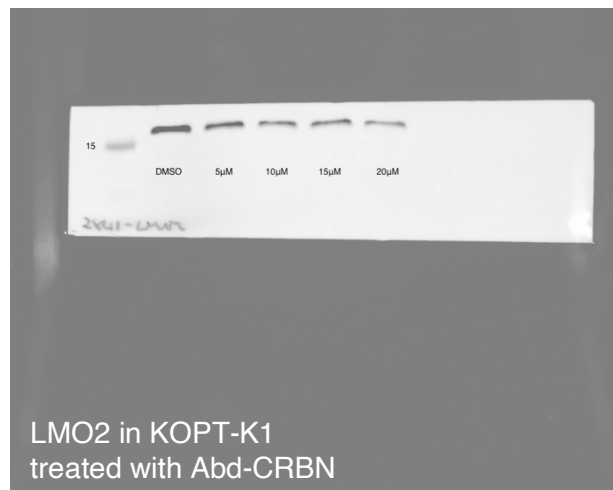

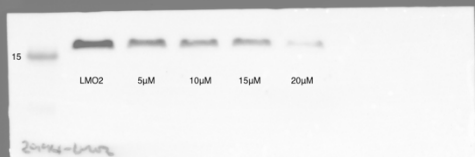

LMO2 in KOPT-K1  
treated with Abd-VHL

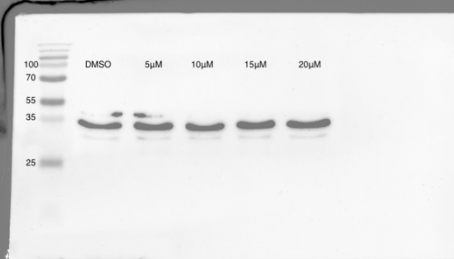

Lyl-1 in KOPT-K1  
treated with Abd-CRBN

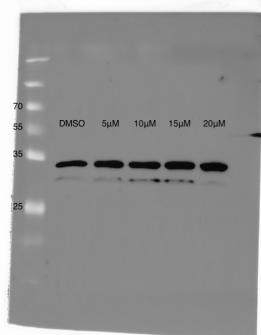

Lyl-1 in CCRF-CEM  
treated with Abd-CRBN

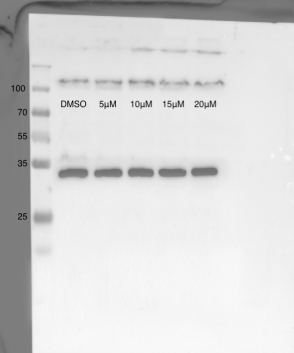

Lyl-1 in CCRF-CEM  
treated with Abd-VHL

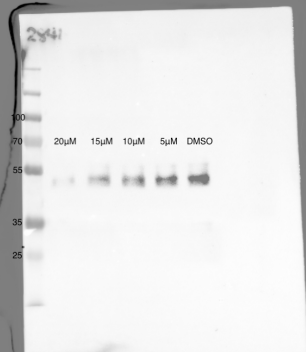

Tal-1 in CCRF-CEM  
treated with Abd-CRBN

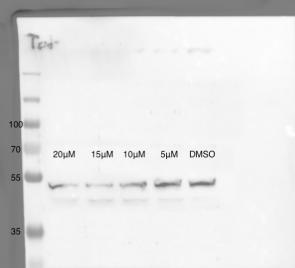

Tal-1 in CCRF-CEM  
treated with Abd-VHL

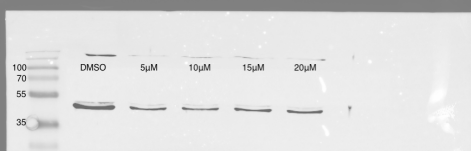

Tal-1 in KOPT-K1  
treated with Abd-CRBN

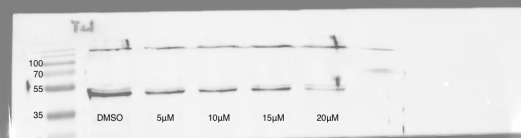

Tal-1 in KOPT-K1  
treated with Abd-VHL

**Figure 3, Source Data 1.** Original membranes corresponding to Figure 3, panel A.
