# Supplementary material for: Degradation of LMO2 in T cell leukaemia results in collateral breakdown of transcription complex partners and causes LMO2-dependent apoptosis
Source: eLife journal article supplement (doi:10.7554/elife.106699), 2025-08-06
Supplement: fig3-data3 [file Figure 3-source data 3.pdf › Figure 3—source data 3 PDF files containing original western blots for Figure 3B, indicating the relevant bands and treatments./Figure 3-source data 3.pdf]

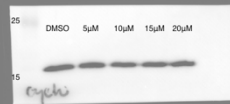

Cyclophilin-b in DND-41  
treated with Abd-CRBN

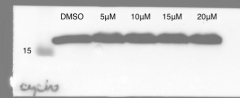

Cyclophilin-b in DND-41  
treated with Abd-VHL

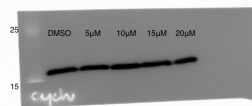

Cyclophilin-b in Jurkat  
treated with Abd-CRBN

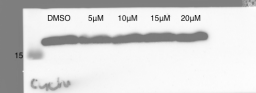

Cyclophilin-b in Jurkat  
treated with Abd-VHL

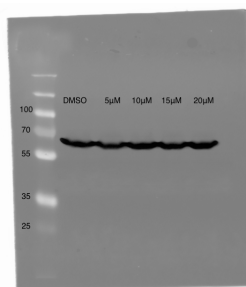

E47 in DND-41  
treated with Abd-CRBN

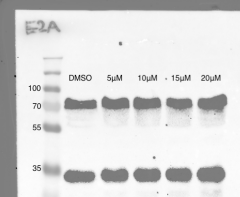

E47 in DND-41  
treated with Abd-VHL

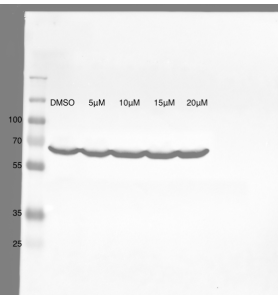

E47 in Jurkat  
treated with Abd-CRBN

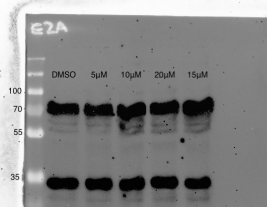

E47 in Jurkat  
treated with Abd-VHL

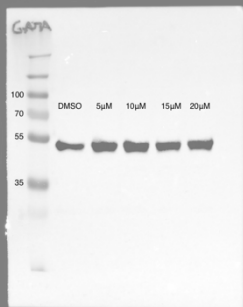

GATA3 in DND-41  
treated with Abd-VHL

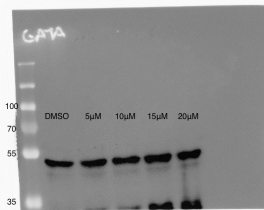

GATA3 in Jurkat  
treated with Abd-CRBN

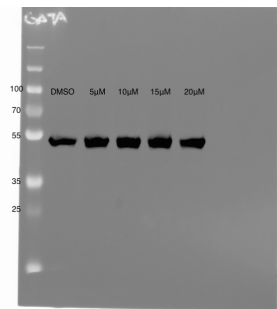

GATA3 in Jurkat  
treated with Abd-VHL

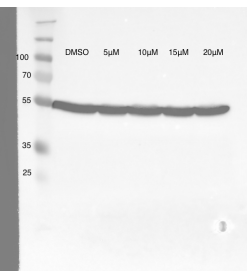

LDB1 in DND-41  
treated with Abd-CRBN

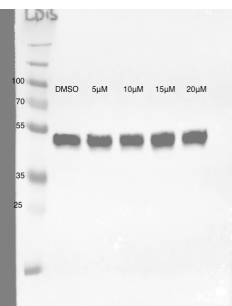

LDB1 in DND-41  
treated with Abd-VHL

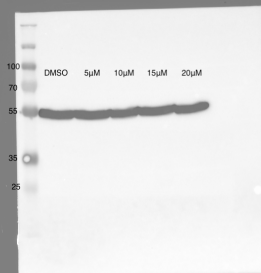

LDB1 in Jurkat  
treated with Abd-CRBN

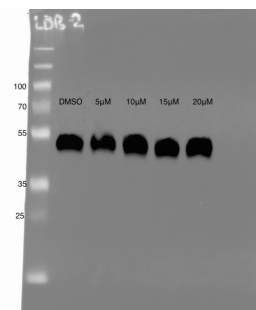

LDB1 in Jurkat  
treated with Abd-VHL

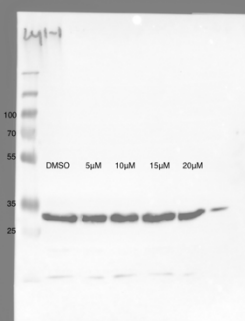

Lyl-1 in DND-41  
treated with Abd-CRBN

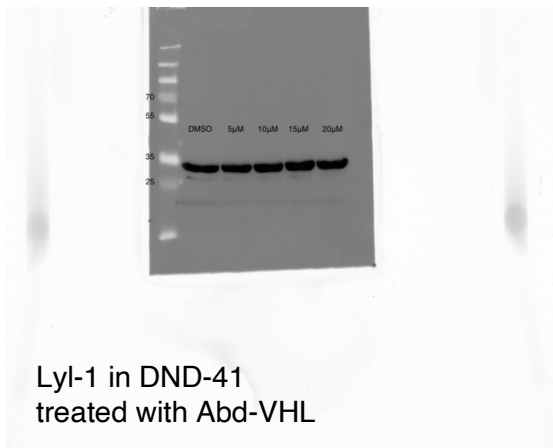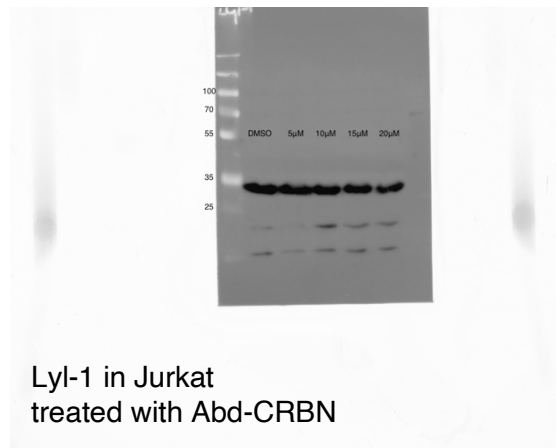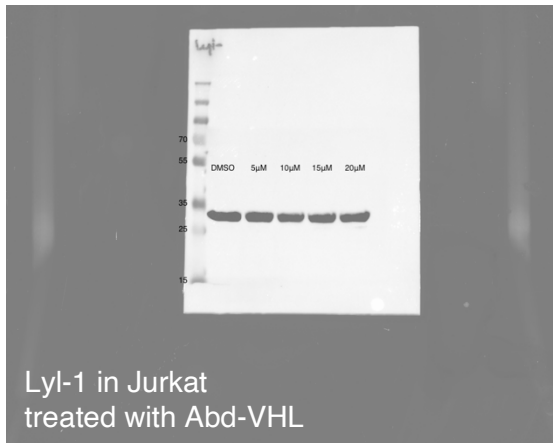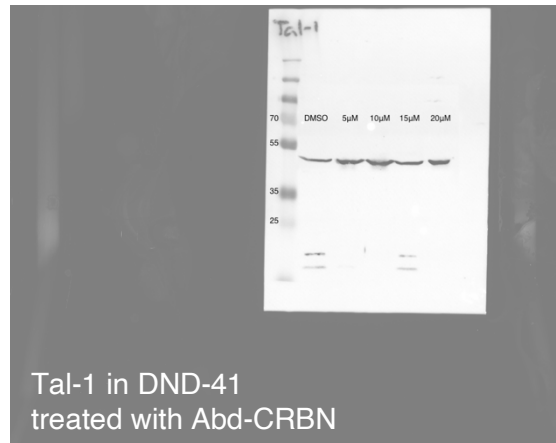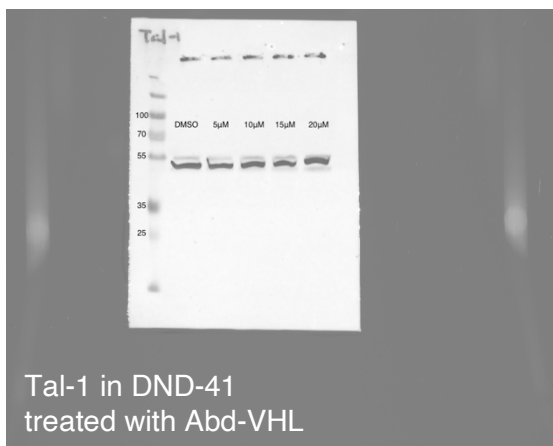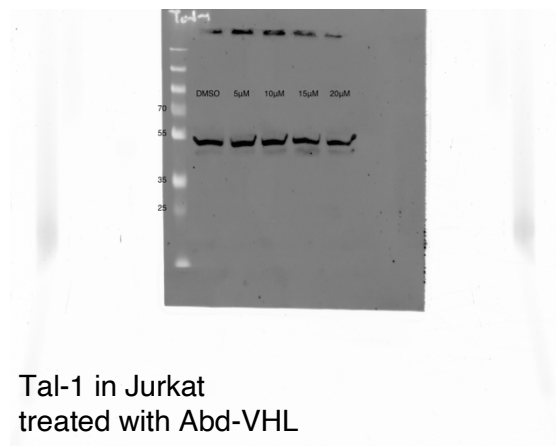

**Figure 3, Source Data 3.** Original membranes corresponding to Figure 3, panel B.
