# Supplementary material for: Degradation of LMO2 in T cell leukaemia results in collateral breakdown of transcription complex partners and causes LMO2-dependent apoptosis
Source: eLife journal article supplement (doi:10.7554/elife.106699), 2025-08-06
Supplement: fig3-data5 [file Figure3-source data 5.pdf › Figure 3—source data 5 PDF files containing original western blots for Figure 3C, indicating the relevant bands and treatments./Figure3-source data 5.pdf]

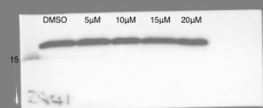

Cyclophilin-b in CCRF-CEM  
treated with Abd-CRBN

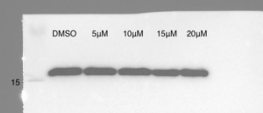

Cyclophilin-b in CCRF-CEM  
treated with Abd-VHL

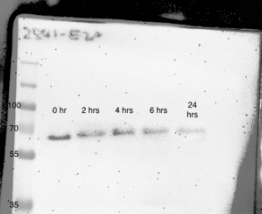

E47 in CCRF-CEM  
treated with Abd-CRBN

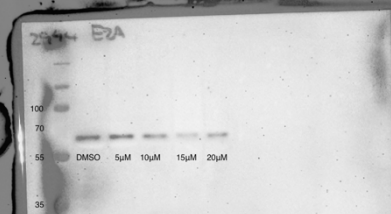

E47 in CCRF-CEM  
treated with Abd-VHL

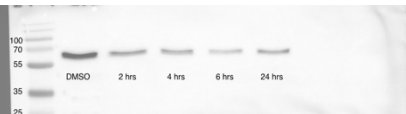

E47 in KOPT-K1  
treated with Abd-CRBN

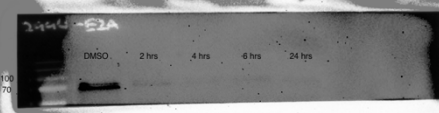

E47 in KOPT-K1  
treated with Abd-VHL

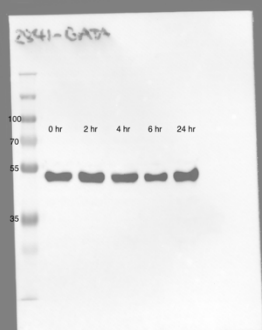

GATA3 in CCRF-CEM  
treated with Abd-CRBN

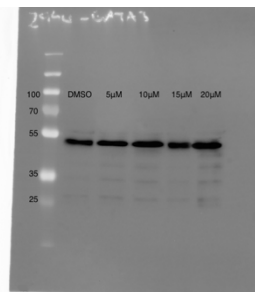

GATA3 in CCRF-CEM  
treated with Abd-VHL

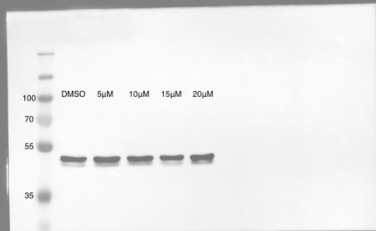

LDB1 in CCRF-CEM  
treated with Abd-CRBN

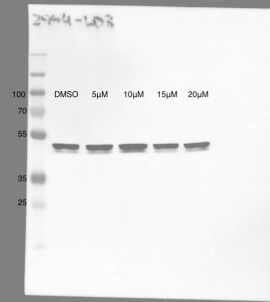

LDB1 in CCRF-CEM  
treated with Abd-VHL

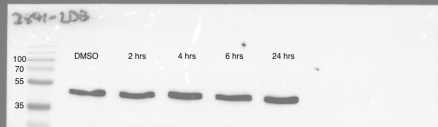

LDB1 in KOPT-K1  
treated with Abd-CRBN

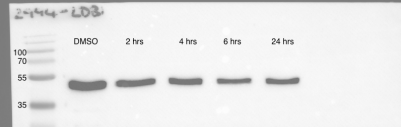

LDB1 in KOPT-K1  
treated with Abd-VHL

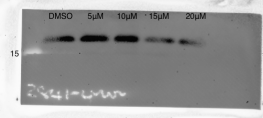

LMO2 in CCRF-CEM  
treated with Abd-CRBN

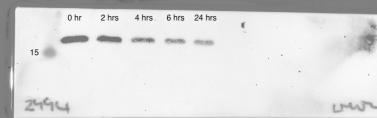

LMO2 in CCRF-CEM  
treated with Abd-VHL

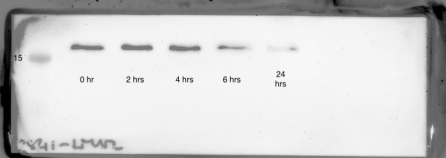

LMO2 in KOPT-K1  
treated with Abd-CRBN

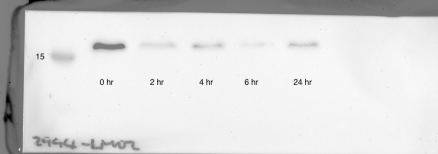

LMO2 in KOPT-K1  
treated with Abd-VHL

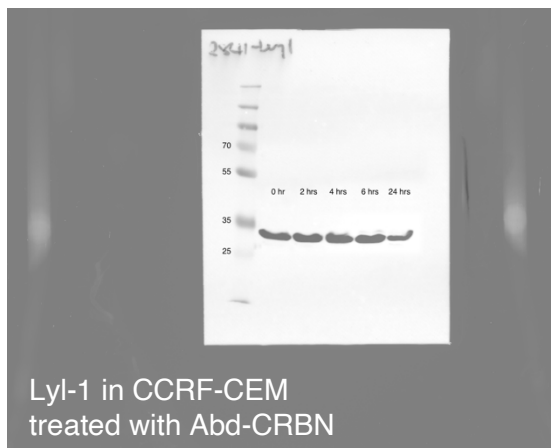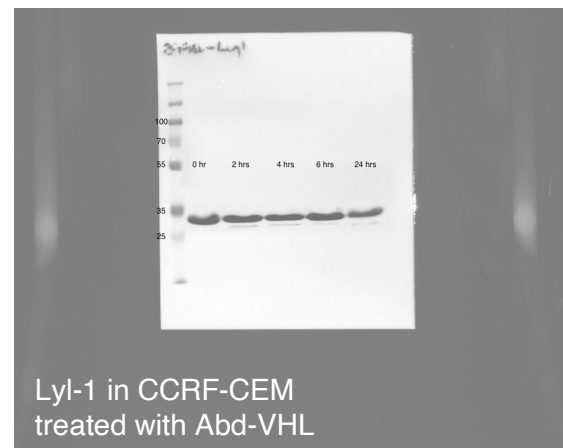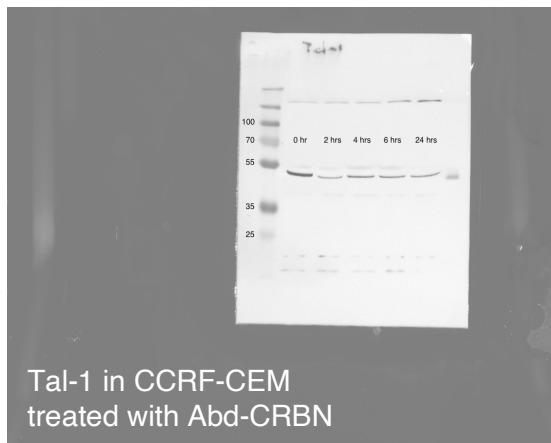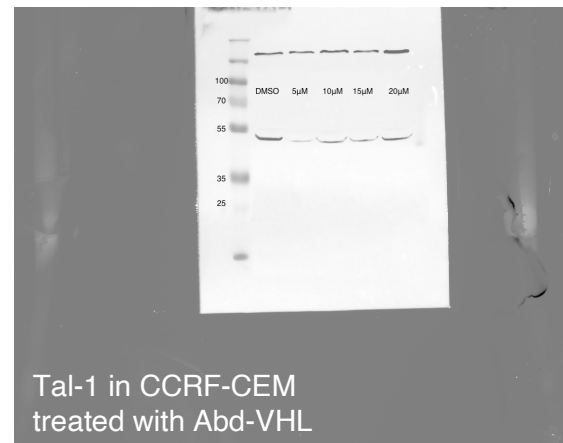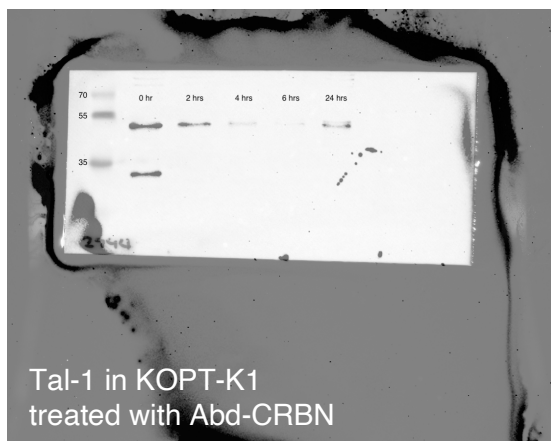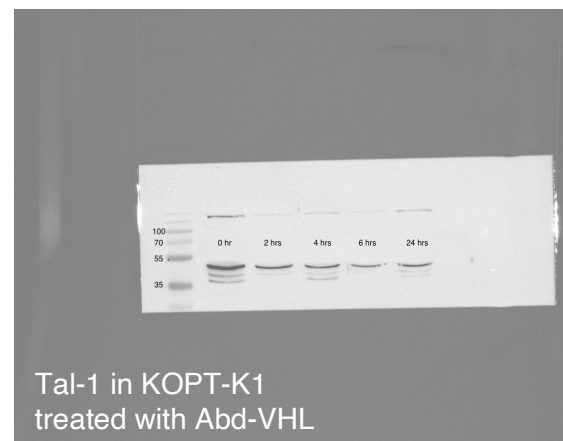

**Figure 3, Source Data 5.** Original membranes corresponding to Figure 3, panel C.
