# Supplementary material for: Degradation of LMO2 in T cell leukaemia results in collateral breakdown of transcription complex partners and causes LMO2-dependent apoptosis
Source: eLife journal article supplement (doi:10.7554/elife.106699), 2025-08-06
Supplement: fig3-figsupp1-data1 [file Figure 3-figure supplement 1-source data 1.pdf › Figure 3—figure supplement 1-source data 1 Western blot data with label shows half-lives of LMO2 and LMO2 protein complex in KOPT-K1./Figure 3-figure supplement 1-source data 1.pdf]

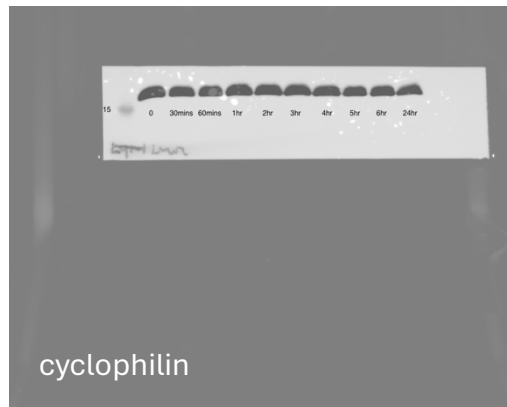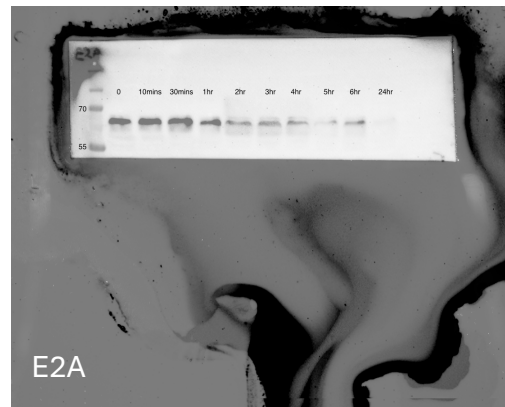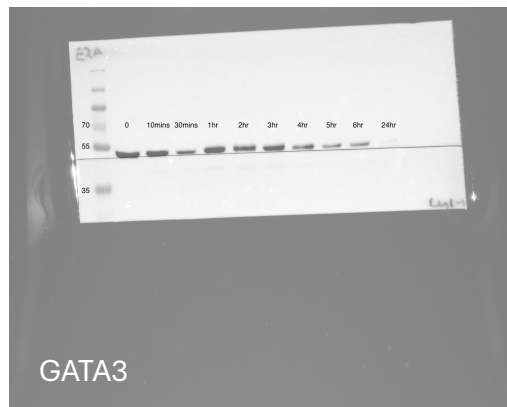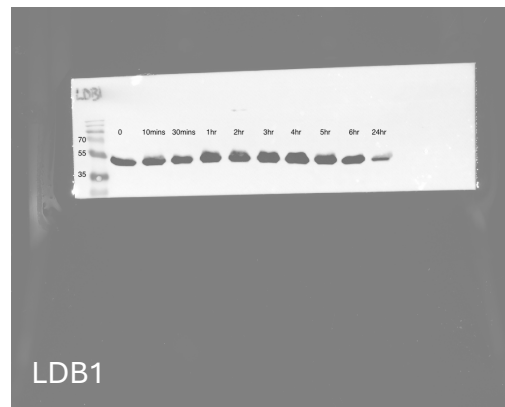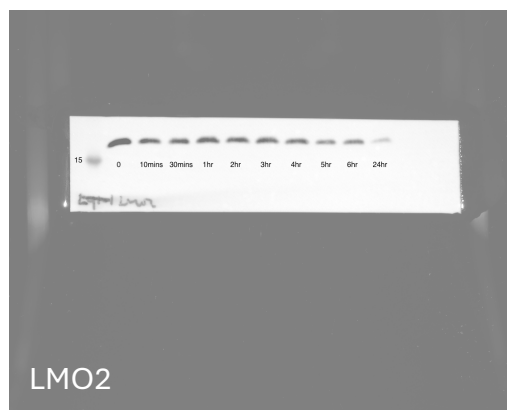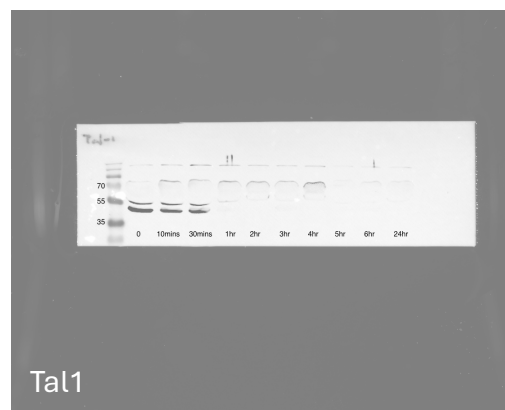

**Figure 3-figure supplement 1, Source Data 1.** Original membranes corresponding to Figure 3-figure supplement 1, panel A.
