# Supplementary material for: Degradation of LMO2 in T cell leukaemia results in collateral breakdown of transcription complex partners and causes LMO2-dependent apoptosis
Source: eLife journal article supplement (doi:10.7554/elife.106699), 2025-08-06
Supplement: fig4-data1 [file Figure 4-source data 1.pdf › Figure 4—source data 1 PDF files containing original western blots for Figure 4A, indicating the relevant bands and treatments./Figure 4-source data 1.pdf]

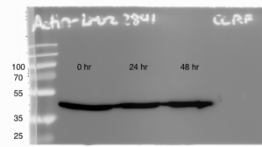

Actin in CCRF-CEM  
treated with Abd-CRBN

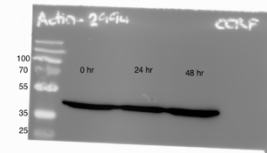

Actin in CCRF-CEM  
treated with Abd-VHL

Actin in KOPT-K1  
treated with Abd-CRBN and Abd-CRBN

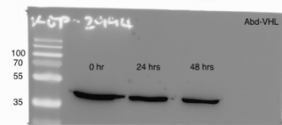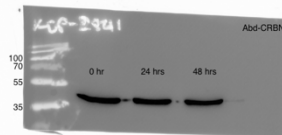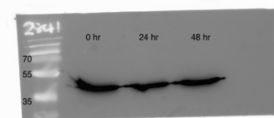

Actin in LOUCY  
treated with Abd-CRBN

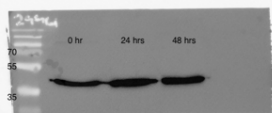

Actin in LOUCY  
treated with Abd-VHL

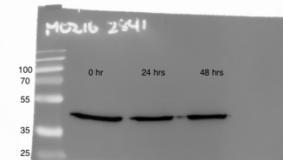

Actin in MOLT-16  
treated with Abd-CRBN

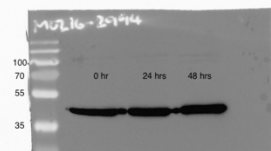

Actin in MOLT-16  
treated with Abd-VHL

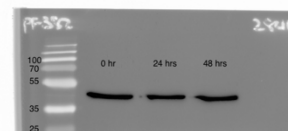

Actin in PF-382  
treated with Abd-CRBN

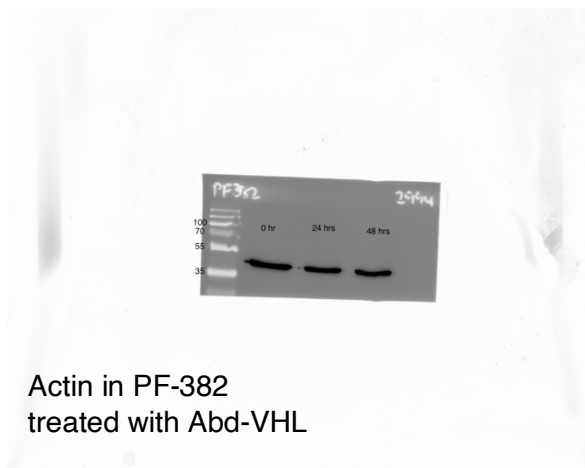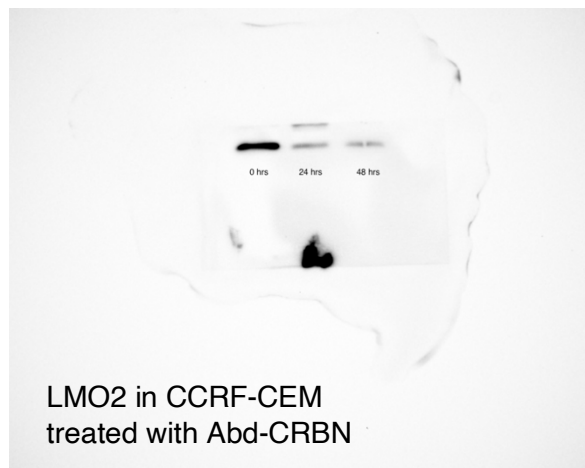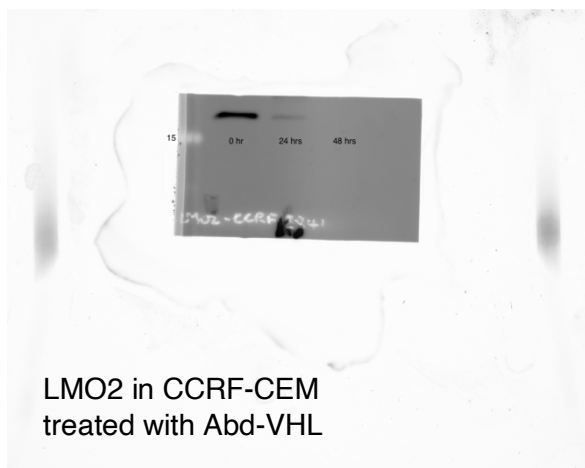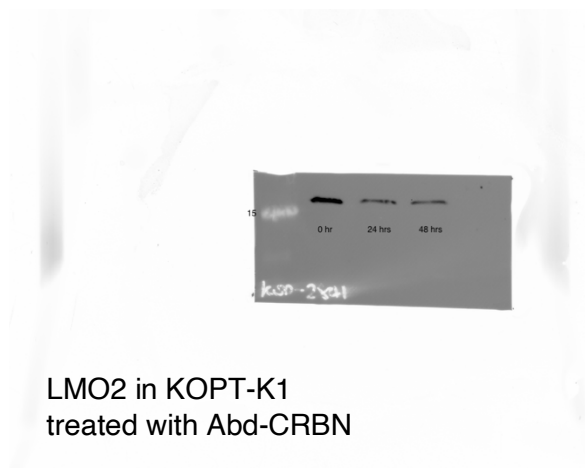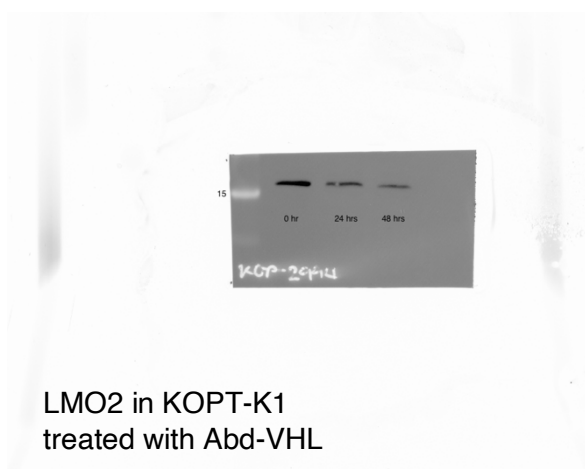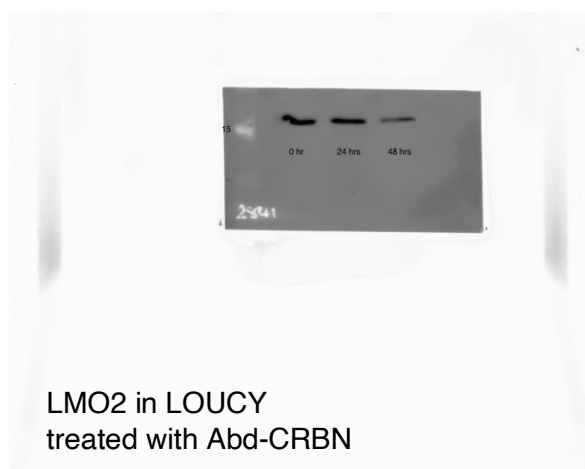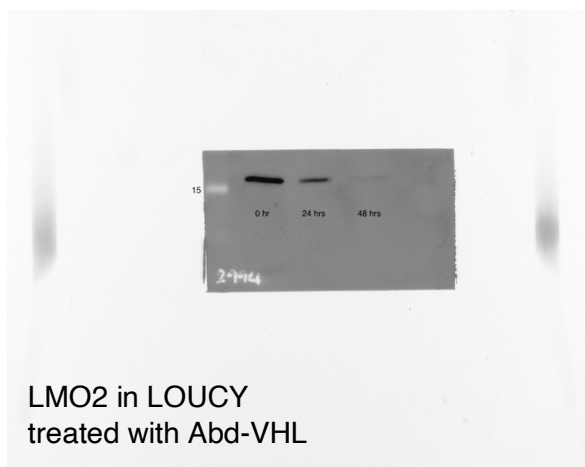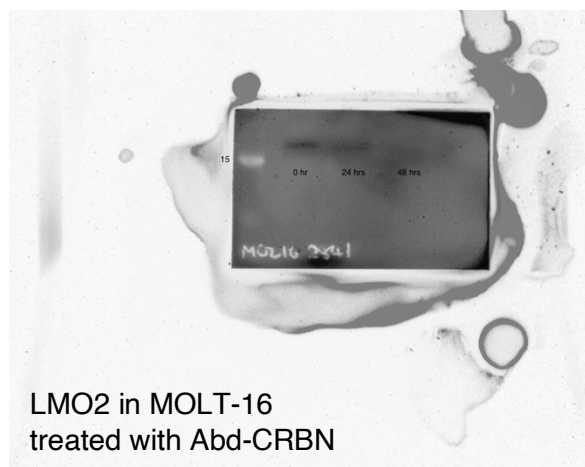

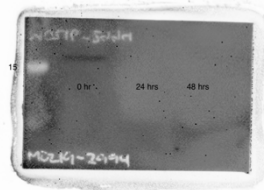

LMO2 in MOLT-16  
treated with Abd-VHL

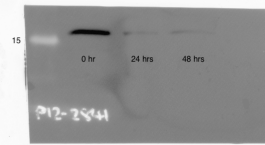

LMO2 in P12-Ichikawa  
treated with Abd-CRBN

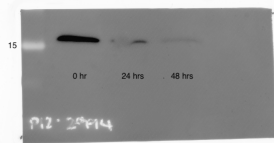

LMO2 in P12-Ichikawa  
treated with Abd-VHL

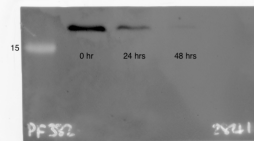

LMO2 in PF-382  
treated with Abd-CRBN

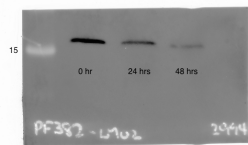

LMO2 in PF-382  
treated with Abd-VHL

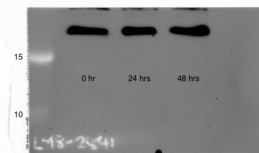

pan-RAS in CCRF-CEM  
treated with Abd-CRBN

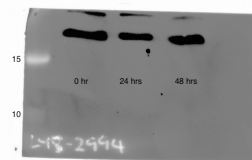

pan-RAS in CCRF-CEM  
treated with Abd-VHL

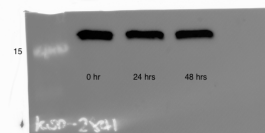

pan-RAS in KOPT-K1  
treated with Abd-CRBN

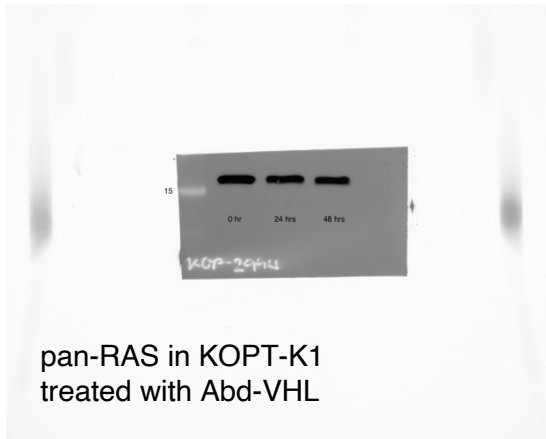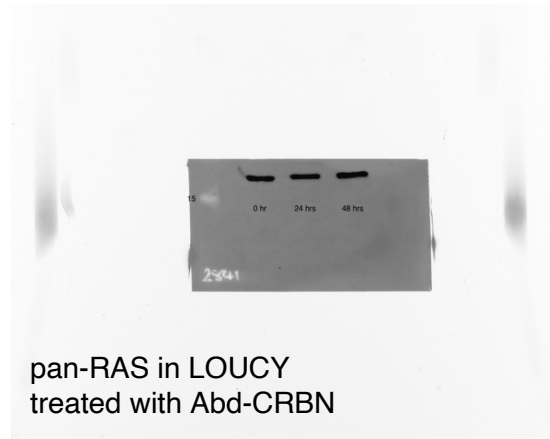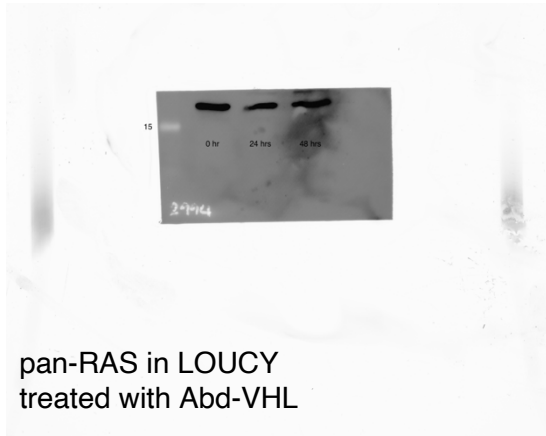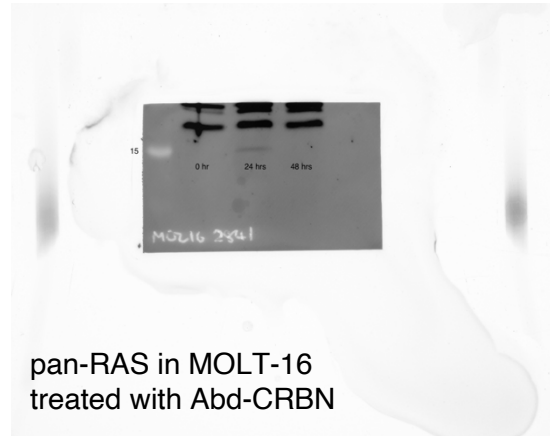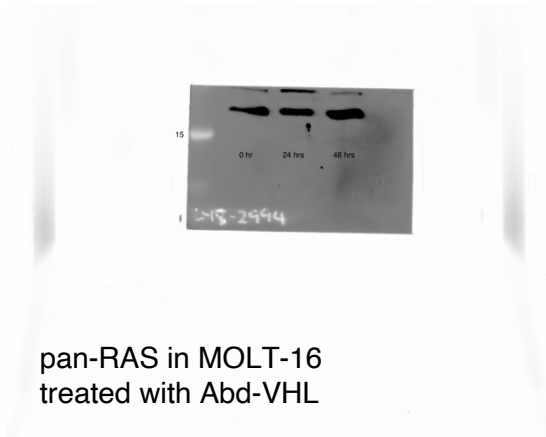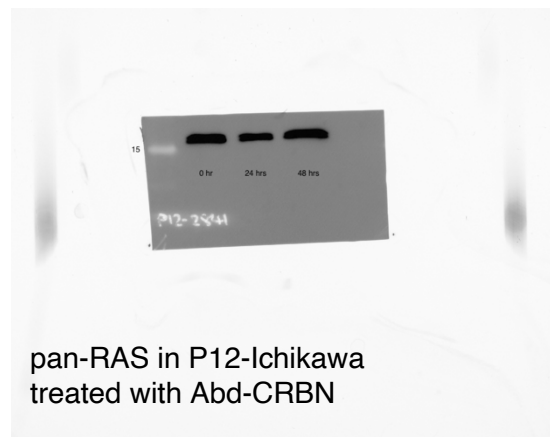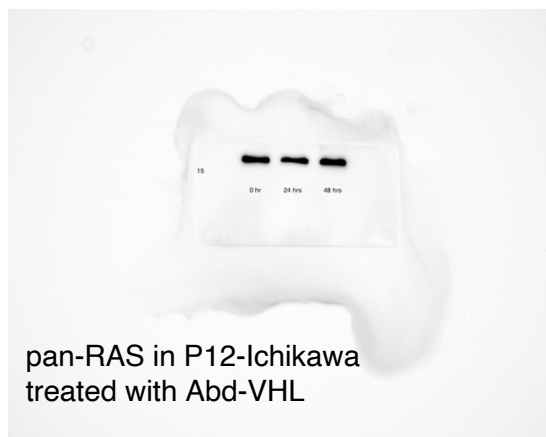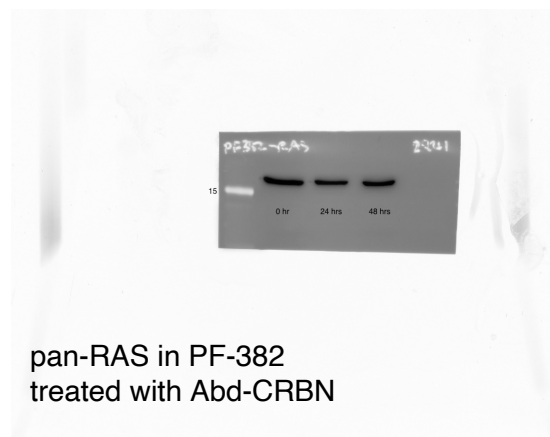

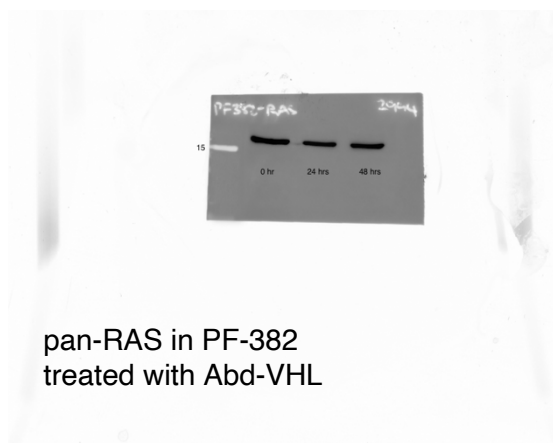

**Figure 4, Source Data 1.** Original membranes corresponding to Figure 4, panel A.
