# Supplementary material for: Degradation of LMO2 in T cell leukaemia results in collateral breakdown of transcription complex partners and causes LMO2-dependent apoptosis
Source: eLife journal article supplement (doi:10.7554/elife.106699), 2025-08-06
Supplement: fig4-figsupp2-data1 [file Figure 4-figure supplement 2-cource data 1.pdf › Figure 4—figure supplement 2-source data 1 Agarose gel data with label shows PCR products from RT-PCR analysis of the human T-ALL cells./Figure 4-figure supplement 2-cource data 1.pdf]

KRAS

0.5  
0.3  
0.2

LMO1

LMO2

LMO1

**Figure 4-figure supplement 2, Source Data 1.** Original membranes corresponding to Figure 4-figure supplement 2, panel A-C.
