# Supplementary material for: Degradation of LMO2 in T cell leukaemia results in collateral breakdown of transcription complex partners and causes LMO2-dependent apoptosis
Source: eLife journal article supplement (doi:10.7554/elife.106699), 2025-08-06
Supplement: fig4-figsupp3-data1 [file Figure 4-figure supplement 3-source data 1.pdf › Figure 4—figure supplement 3-source data 1 Agarose gel data with label shows PCR products to confirm the chromosomal translocation in KOPT-K1./Figure 4-figure supplement 3-source data 1.pdf]

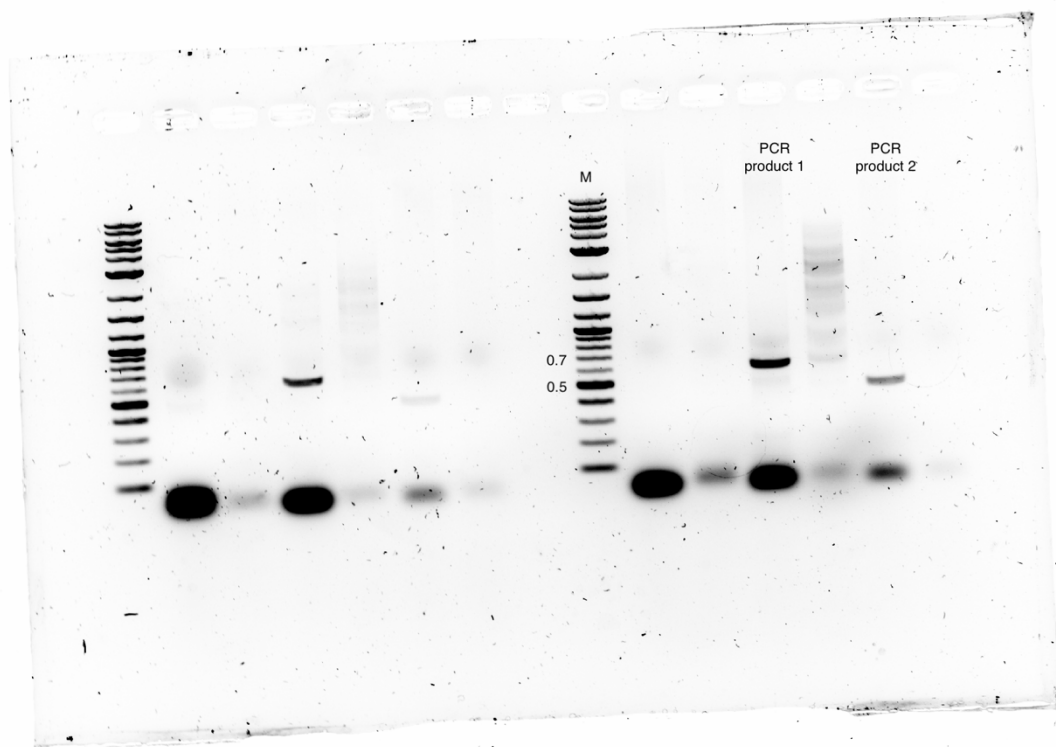

**Figure 4-figure supplement 3, Source Data 1.** Original membranes corresponding to Figure 4-figure supplement 3, panel B
