# Supplementary material for: Degradation of LMO2 in T cell leukaemia results in collateral breakdown of transcription complex partners and causes LMO2-dependent apoptosis
Source: eLife journal article supplement (doi:10.7554/elife.106699), 2025-08-06
Supplement: fig5-data3 [file elife-106699-fig5-data3-v1.pdf]

| Proteins | log <sub>2</sub> FC | Functions                                                                                     |
|----------|---------------------|-----------------------------------------------------------------------------------------------|
| AURKA    | -0.376              | Kinase that contributes to the regulation of cell cycle progression                           |
| KIF2C    | -0.384              | Important for anaphase chromosome segregation                                                 |
| HAUS1    | -0.394              | Maintenance of completion of cytokinesis                                                      |
| CDC25B   | -0.428              | Activates the cyclin dependent kinase CDC2                                                    |
| CCNA2    | -0.429              | Cyclin which controls both the G1/S and the G2/M transition                                   |
| SGO2     | -0.466              | Part of mitotic cohesion complex                                                              |
| UBE2S    | -0.482              | E2 enzyme ubiquitinates APC/C ubiquitin ligase                                                |
| BUB1     | -0.488              | Member of the mitotic checkpoint complex and activating the spindle checkpoint.               |
| USP37    | -0.575              | De-ubiquitinate enzyme promotes cell cycle                                                    |
| MASTL    | -0.602              | MASTL kinase is a master regulator of mitosis                                                 |
| CDCA2    | -0.642              | Regulates chromosome structure during mitosis                                                 |
| UBE2C    | -0.652              | E2 enzyme ubiquitinates APC/C                                                                 |
| MIS18A   | -0.704              | Required normal chromosome segregation during mitosis                                         |
| FAM83D   | -0.803              | Regulates cell proliferation, growth                                                          |
| CKS2     | -1.042              | Binds to CDKs for their function                                                              |
| TXNIP    | -1.667              | Master regulator of cellular oxidation, regulating the expression and function of Thioredoxin |

**Figure 5, supplement 1: Proteins reduced by treatment of KOPT-K1 cells with Abd-VHL**  
 Proteomic data showed the significant downregulated proteins in KOPT-K1 cells when treated with Abd-VHL compared to control treatment (DMSO) and their functions related to cell division. Proteins shown based on the fold change (log<sub>2</sub>FC) and p-value.
