# Supplementary material for: Degradation of LMO2 in T cell leukaemia results in collateral breakdown of transcription complex partners and causes LMO2-dependent apoptosis
Source: eLife journal article supplement (doi:10.7554/elife.106699), 2025-08-06
Supplement: fig6-figsupp1-data1 [file Figure 6-figure supplement 1-source data 1.pdf › Figure 6—figure supplement 1-source data 1 Western blot data with label shows the expression of caspase 7 and cleaved caspase 7 in Jurkat and KOPT-K1 after the treatment of doxorubicin./Figure 6-figure supplement 1-source data 1.pdf]

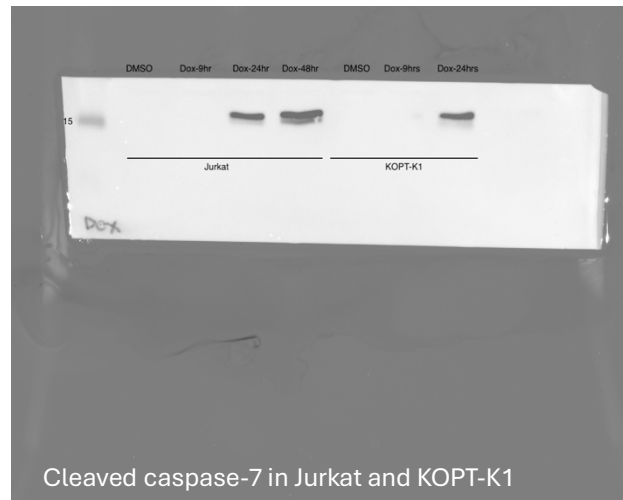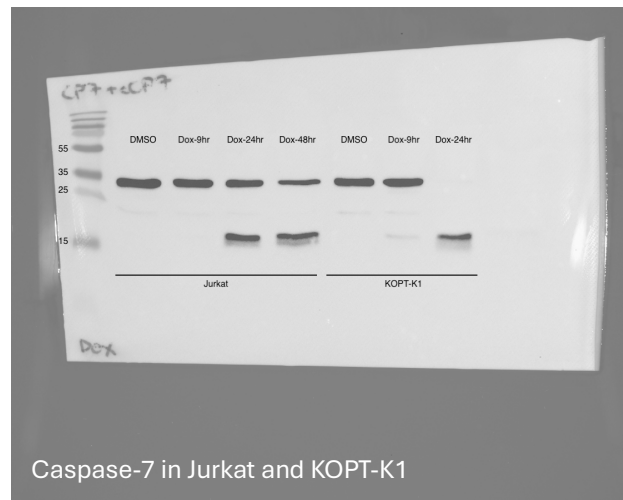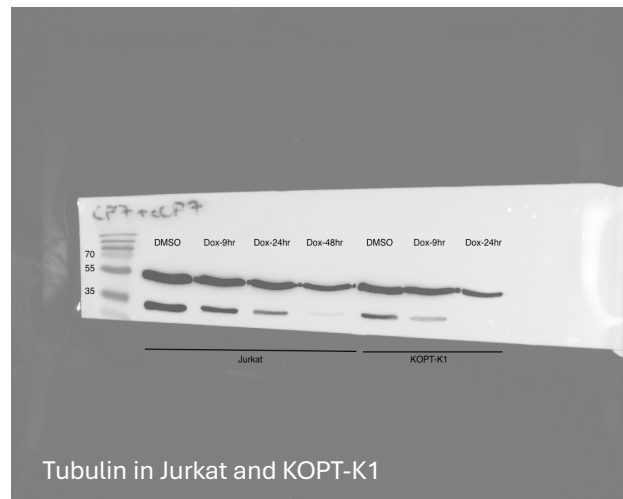

**Figure 6-figure supplement 1, Source Data 1. Original membranes corresponding to Figure 6-figure supplement 1, panel A.**
