# Supplementary material for: Degradation of LMO2 in T cell leukaemia results in collateral breakdown of transcription complex partners and causes LMO2-dependent apoptosis
Source: eLife. 2025 Dec 12;14:RP106699. doi: 10.7554/eLife.106699 (PMC12700530; doi:10.7554/eLife.106699)
Supplement: Figure 2—source data 1. [file elife-106699-fig2-data1.xlsx]

## Sheet: cell viability
Time 9hrs)	Untreated (DMSO)			15 µM PROTAC2841
2	21285	19343	21118	20541	19604	20189
4	21285	19343	21118	19862	20884	20807
6	25533	26128	28693	23599	25779	22877
24	48377	47703	50640	27612	25779	26475

## Sheet: %cell viability
Time (hrs)	15 uM Abd-CRBN
0	100	100	100
2	98.4401	93.9496	96.7532
4	90.8008	95.473	95.121
6	81.1901	85.6257	85.9941
24	55.9329	52.2199	53.6298
