# Supplementary material for: Degradation of LMO2 in T cell leukaemia results in collateral breakdown of transcription complex partners and causes LMO2-dependent apoptosis
Source: eLife. 2025 Dec 12;14:RP106699. doi: 10.7554/eLife.106699 (PMC12700530; doi:10.7554/eLife.106699)
Supplement: Figure 2—source data 2. [file elife-106699-fig2-data2.xlsx]

## Sheet: cell number
Time 9hrs)	Untreated (DMSO)			15 µM PROTAC2841
2	21285	19343	21118	18462	21132	20828
4	21285	19343	21118	20410	20376	19555
6	25533	26128	28693	20766	21335	21053
24	48377	47703	50640	24653	25115	24858

## Sheet: %cell viability
Time (hrs)	15 uM Abd-CRBN
0	100	100	100
2	88.4767	101.272	99.8155
4	93.3061	93.1506	89.3974
6	78.0589	80.1977	79.1377
24	49.939	50.8748	50.3542
