# Supplementary material for: Degradation of LMO2 in T cell leukaemia results in collateral breakdown of transcription complex partners and causes LMO2-dependent apoptosis
Source: eLife. 2025 Dec 12;14:RP106699. doi: 10.7554/eLife.106699 (PMC12700530; doi:10.7554/eLife.106699)
Supplement: Figure 2—source data 3. [file elife-106699-fig2-data3.xlsx]

## Sheet: cell viability
	Concentration (uM)	cell viability
	0	949722	1007644	1005030	1019151
	5	905245	837364	931888	905037
	10	798265	745498	850469	801089
	15	666700	632301	644278	700230
	20	531186	551073	579983	582665

## Sheet: %cell viability
	Concentration (uM)	%cell viability
	0	100	100	100	100
	5	95.32	83.1	92.72	88.8
	10	84.05	73.98	84.62	78.6
	15	70.2	62.75	64.11	68.71
	20	55.93	54.69	57.71	57.17
