# Supplementary material for: Degradation of LMO2 in T cell leukaemia results in collateral breakdown of transcription complex partners and causes LMO2-dependent apoptosis
Source: eLife. 2025 Dec 12;14:RP106699. doi: 10.7554/eLife.106699 (PMC12700530; doi:10.7554/eLife.106699)
Supplement: Figure 2—source data 4. [file elife-106699-fig2-data4.xlsx]

## Sheet: cell viability
	Concentration (uM)	cell viability
	0	949891	1029835	1085677	1004931
	5	845102	930720	950404	948526
	10	744690	763728	848811	704698
	15	604556	664684	583610	574111
	20	505162	587166	525948	498238

## Sheet: %cell viability
	Concentration (uM)	%cell viability
	0	100	100	100	100
	5	88.97	90.38	87.54	94.39
	10	78.4	74.16	78.18	70.12
	15	63.64	64.54	53.76	57.13
	20	53.18	57.02	48.44	49.58
