# Supplementary material for: Degradation of LMO2 in T cell leukaemia results in collateral breakdown of transcription complex partners and causes LMO2-dependent apoptosis
Source: eLife. 2025 Dec 12;14:RP106699. doi: 10.7554/eLife.106699 (PMC12700530; doi:10.7554/eLife.106699)
Supplement: Figure 2—source data 5. [file elife-106699-fig2-data5.xlsx]

## Sheet: Sheet1
concentration (uM)	LMO2			MAX			RHOBWT-FL			KRASWT-FL			GFP2			ISL1
0	749650	813243	829462	825044	722943	707894	819922	808473	734130	710546	710494	807426	744006	749843	803320	750590	767195	754032
10	680484	653433	653322	650712	673446	743754	715906	740539	815804	724990	715353	670030	741230	740239	755330	749289	745086	758478
20	407186	319493	306526	740698	710389	667238	788270	783034	805324	753810	732029	707296	746918	756363	785168	720498	700217	720107
