# Supplementary material for: Degradation of LMO2 in T cell leukaemia results in collateral breakdown of transcription complex partners and causes LMO2-dependent apoptosis
Source: eLife. 2025 Dec 12;14:RP106699. doi: 10.7554/eLife.106699 (PMC12700530; doi:10.7554/eLife.106699)
Supplement: Figure 2—source data 6. [file elife-106699-fig2-data6.xlsx]

## Sheet: Sheet1
concentration (uM)	LMO2			MAX			RHOBWT-FL			KRASWT-FL			GFP2			ISL1			Zn268
0	749650	750390	829462	825044	734933	707894	819922	740393	734130	710546	740393	807426	744006	764933	803320	767195	750490	754032	763360	750389	785386
10	680484	649348	653322	650712	664943	743754	715906	804984	815804	724990	684494	670030	741230	740585	755330	745086	745111	758478	768035	754093	744385
20	407186	342893	306526	740698	674493	667238	788270	774393	805324	753810	710484	707296	746918	753084	785168	700217	715953	720107	784361	710484	705181
