# Supplementary material for: Degradation of LMO2 in T cell leukaemia results in collateral breakdown of transcription complex partners and causes LMO2-dependent apoptosis
Source: eLife. 2025 Dec 12;14:RP106699. doi: 10.7554/eLife.106699 (PMC12700530; doi:10.7554/eLife.106699)
Supplement: Figure 2—source data 7. [file elife-106699-fig2-data7.xlsx]

## Sheet: Sheet1
Concentration (uM)	2841			2994
0	174457	162053	186024	174457	162053	186024
10	179674	163059	166440	176635	183016	167018
20	144885	161435	177411	175611	164644	170064
