# Supplementary material for: Degradation of LMO2 in T cell leukaemia results in collateral breakdown of transcription complex partners and causes LMO2-dependent apoptosis
Source: eLife. 2025 Dec 12;14:RP106699. doi: 10.7554/eLife.106699 (PMC12700530; doi:10.7554/eLife.106699)
Supplement: Figure 4—source data 3. [file elife-106699-fig4-data3.xlsx]

## Sheet: Sheet1
	Time (hrs)	DMSO			Abd-CRBN			Abd-VHL
RPMI8402	0	2343285	2048443	1699234	1759329	1789947	2152301	1729923	2048844	2093214
	24	3843169	3987423	4087281	3462897	3496787	3768030	3183391	3204842	3599983
	48	7741328	7540394	7090806	6546787	6504584	6301103	6057296	5640384	5500381
MOLT-16	0	1553436	1557038	1621029	1502382	1554394	1621923	1703821	1774494	1800133
	24	3511874	3204384	3333799	2669972	2640947	2442721	2369972	2104484	2442721
	48	6099826	6048437	6480031	4071355	3886565	3815696	3429168	3405875	3688712
CCRF-CEM	0	2303841	2305856	2538199	2199932	2204885	2348911	2304839	2340585	2390385
	24	7510035	7204843	6977024	6230800	6200055	6155371	5847525	5693474	5646753
	48	15276567	15394484	14340026	10390133	10319755	10207734	10228379	10048475	9000324
SUPT-1	0	1672937	1664034	1700034	1713289	1669575	1681834	1699239	1694746	1714894
	24	2933787	2703585	2763633	2878692	2909578	2940531	2502860	2605847	2884322
	48	5365646	5058447	4936700	4920845	4894745	4880454	4747989	4505883	4372274
LOUCY	0	1712381	2104485	2312381	1704838	1740485	2012381	1713827	2085547	2003283
	24	4663360	4740385	5003644	4321405	4299474	4374036	3818584	3857464	3956793
	48	9001355	9405854	9401355	6971691	7050474	7348825	5830750	5904836	7040769
DND-41	0	189343	177957	179843	172193	177449	184393	173823	180447	213293
	24	320584	365048	360844	370483	360857	351553	365009	352686	314343
	48	615002	629487	651949	632944	609475	592104	615638	570857	568864
PF-382	0	176049	177436	181940	175232	179047	213033	171739	174048	190434
	24	390833	364857	356952	274942	279484	282007	254042	256847	275553
	48	678662	643933	646212	352773	350583	399164	334357	320585	291943
KOPT-K1	0	220484	194734	183022	219342	200474	194233	204023	200485	194493
	24	391044	375625	374870	287442	289474	310046	265545	279874	285084
	48	851113	864048	919443	555514	560443	607184	556744	509474	513923
ALL-SIL	0	184022	188645	194116	183932	185968	191194	187439	180854	185442
	24	284394	284653	299294	289044	290048	281743	310383	309575	281094
	48	578221	579746	604285	555143	540575	519443	555663	510853	505338
Jurkat	0	194043	184353	182115	185900	188048	194333	185110	188048	195390
	24	392593	390585	405449	416284	380476	380322	411948	394846	390774
	48	856482	779474	769529	757552	740374	741149	741948	710484	731237
P12-Ichikawa	0	188194	189047	191055	185003	188474	197532	185009	188048	191954
	24	384295	395763	380943	302174	308473	341949	335226	310575	315322
	48	689903	664957	639218	508484	450487	450043	433974	430785	472943
