# Supplementary material for: Degradation of LMO2 in T cell leukaemia results in collateral breakdown of transcription complex partners and causes LMO2-dependent apoptosis
Source: eLife. 2025 Dec 12;14:RP106699. doi: 10.7554/eLife.106699 (PMC12700530; doi:10.7554/eLife.106699)
Supplement: Figure 6—source data 3. [file elife-106699-fig6-data3.xlsx]

## Sheet: Sheet1
Time (hrs)	Jurkat 20 μM Abd-CRBN			Jurkat 20 μM Abd-VHL			KOPT-K1 20 μM Abd-CRBN			KOPT-K1 20 μM Abd-VHL			KOPT-K1 DMSO			Jurkat DMSO
0	0	0	0	0	0	0	0	0	0	0	0	0	0	0	0	0	0	0
4	18209	18133	14238	19029	19947	21589	20249	21048	26401	20090	20183	18830	890	999	1000	1129	1044	931
6	20023	17593	17739	21138	21048	18309	35710	32085	31981	37502	38565	41840	1048	1004	1007	1302	1094	1043
12	18470	18044	21942	45000	45028	45000	53293	55038	63249	104390	119474	153928	1149	1000	980	932	1077	1302
20	27492	25058	24429	59937	60833	61309	109301	92043	91392	255938	260474	300454	990	978	1200	1240	1094	991
24	30123	31047	34932	70320	71084	80432	135398	155038	177430	340348	350585	381383	1038	1004	990	1049	1001	993
30	34302	35038	53001	85044	86032	100323	205309	210857	252422	500485	475058	453201	931	1194	1321	1231	1194	930
