# Supplementary figures and images for: Degradation of LMO2 in T cell leukaemia results in collateral breakdown of transcription complex partners and causes LMO2-dependent apoptosis
Source: eLife journal article supplement (doi:10.7554/elife.106699), 2025-08-06

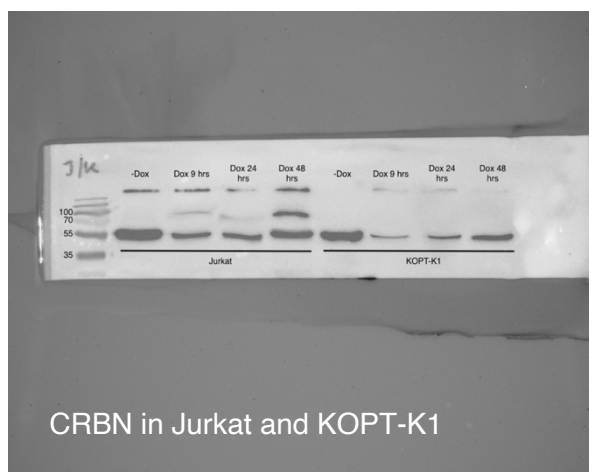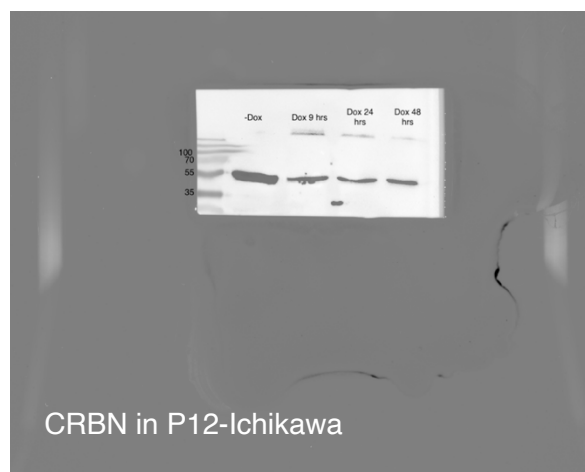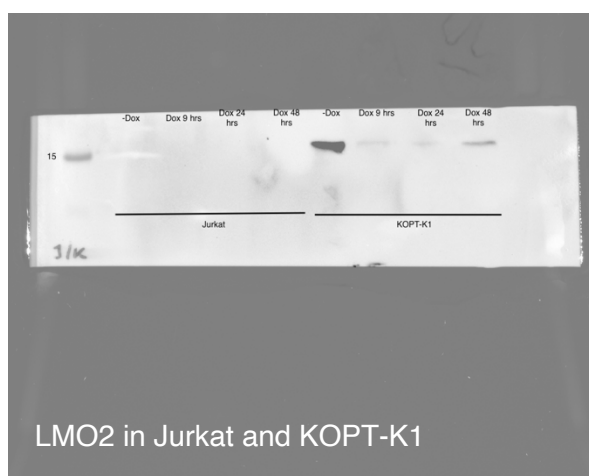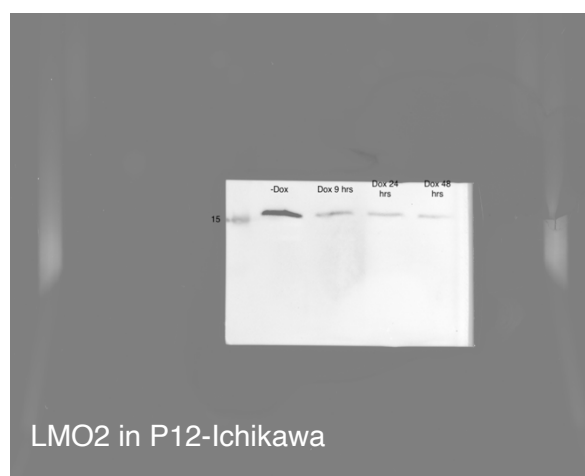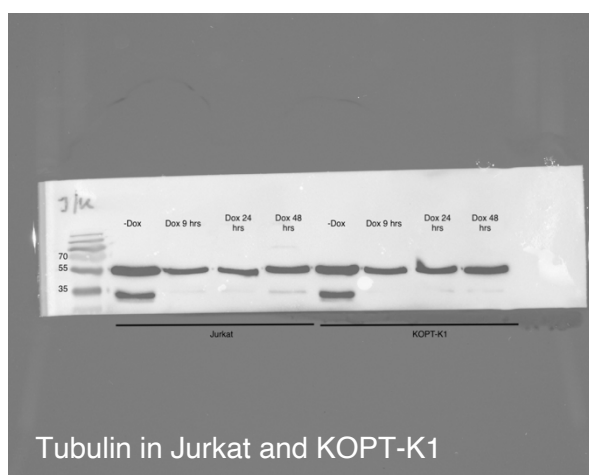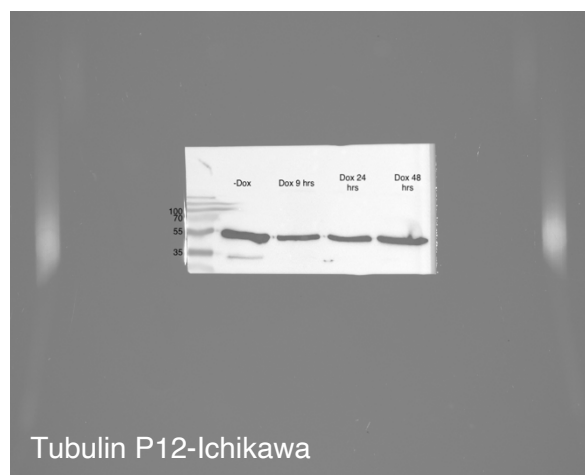

**Figure 1, Source Data 1.** Original membranes corresponding to Figure 1, panel A.

Supplement: fig1-data1 [file Figure 1—source data 1 .pdf › Figure 1—source data 1 PDF files containing original western blots for Figure 1A, indicating the relevant bands and treatments./Figure 1—source data 1 .pdf]

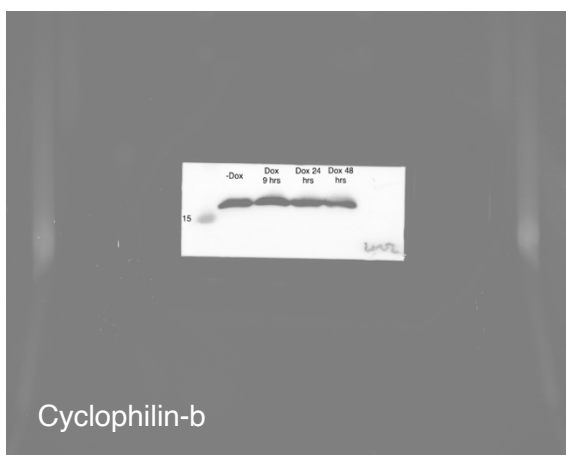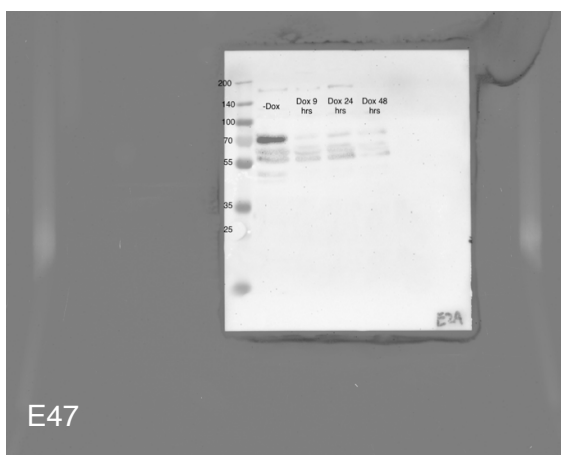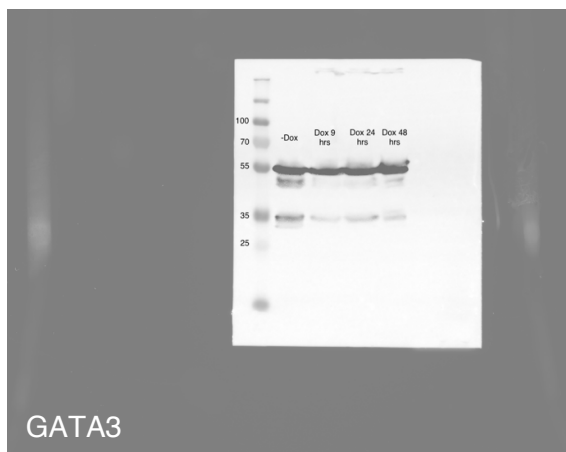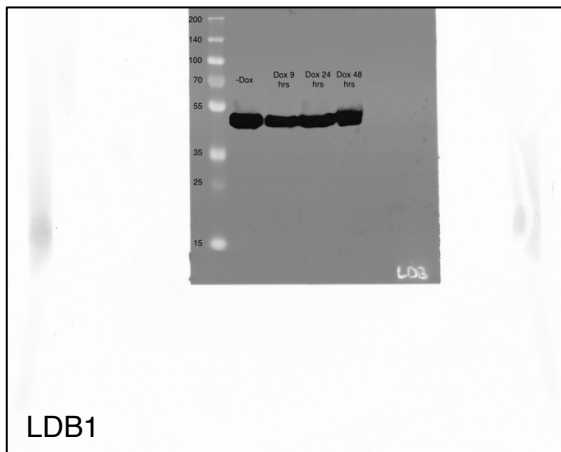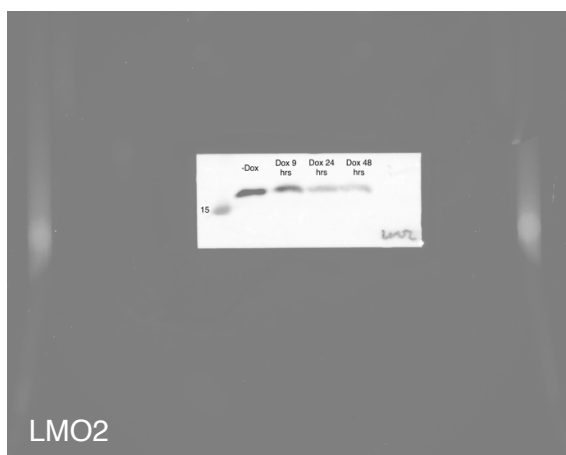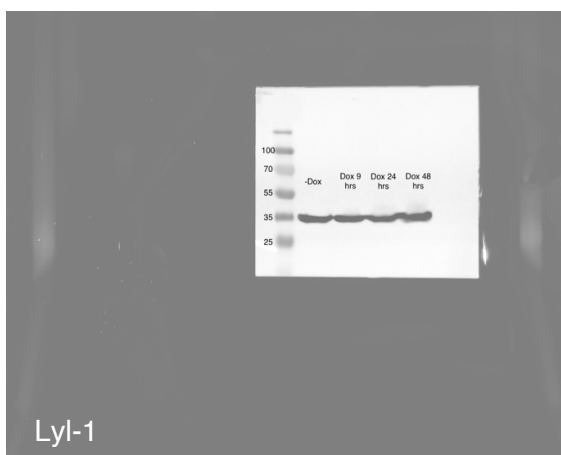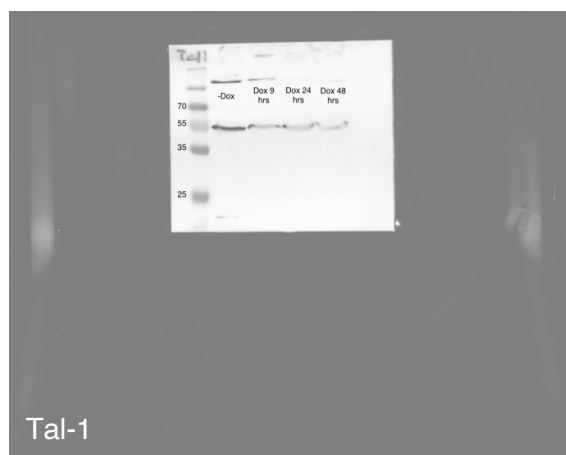

**Figure 1, Source Data 3.** Original membranes corresponding to Figure 1, panel B.

Supplement: fig1-data3 [file Figure 1—source data 3.pdf › Figure 1—source data 3 PDF files containing original western blots for Figure 1B, indicating the relevant bands and treatments./Figure 1—source data 3.pdf]

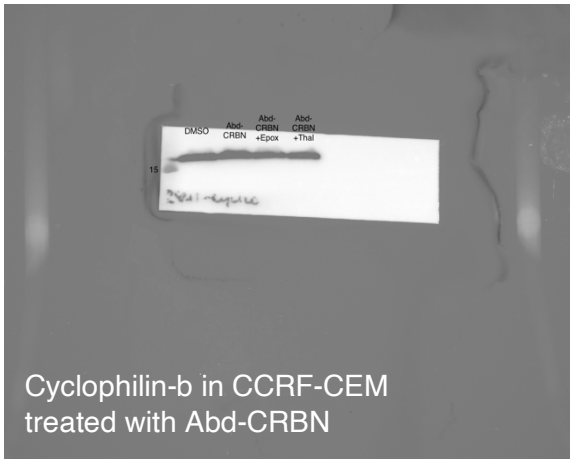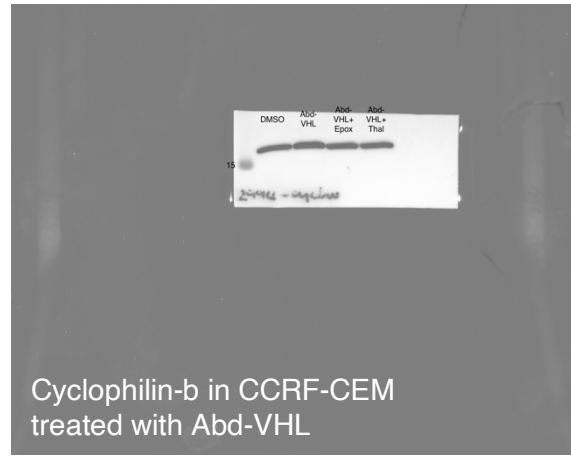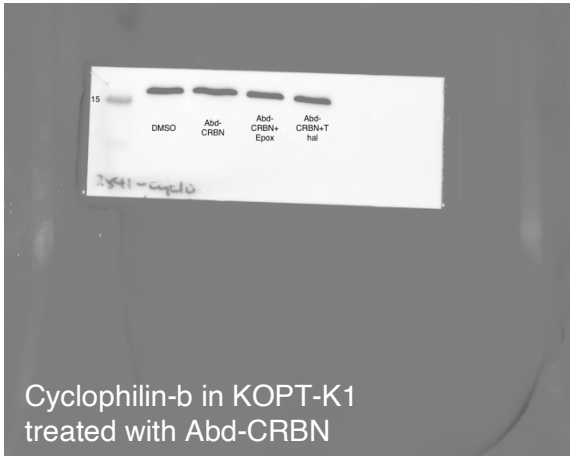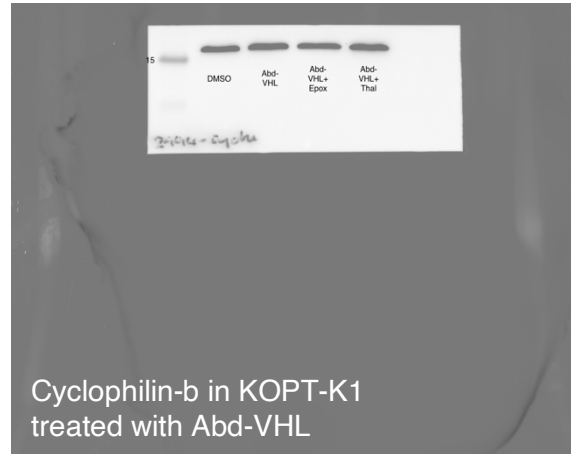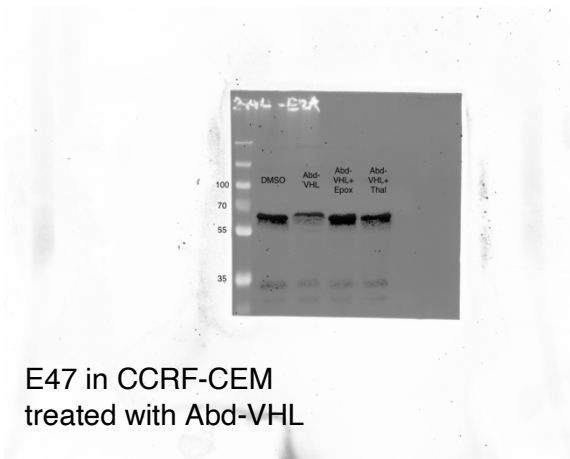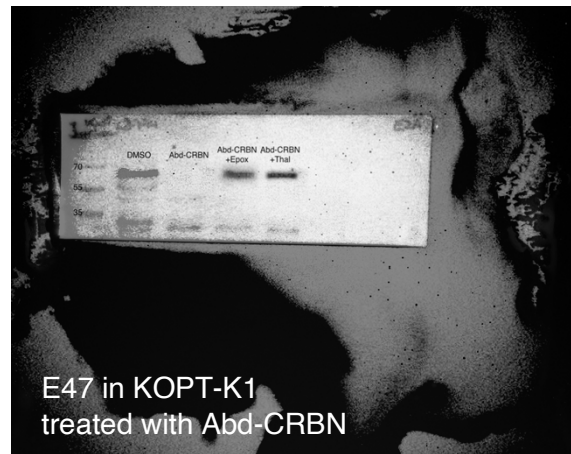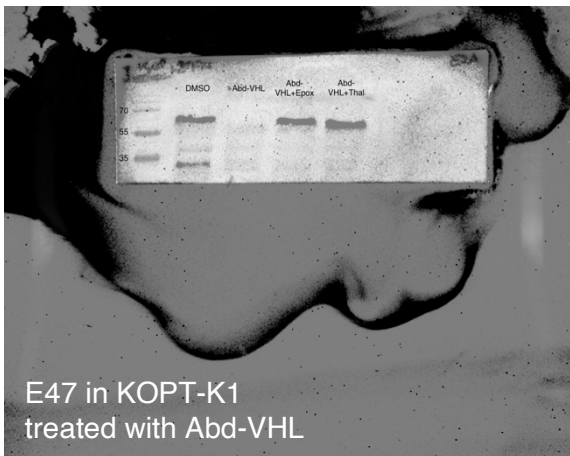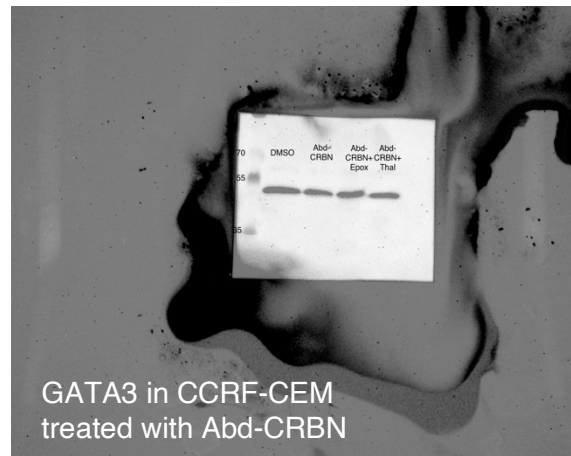

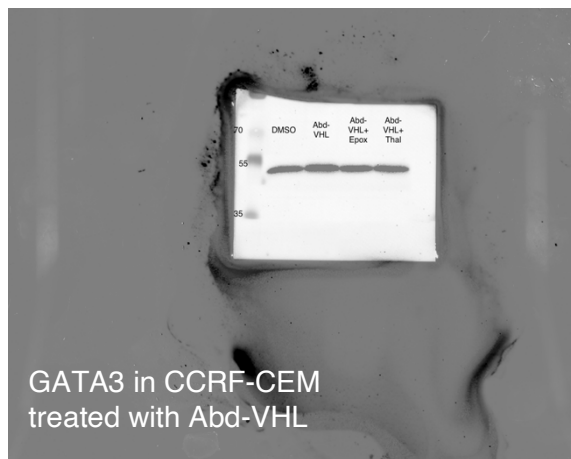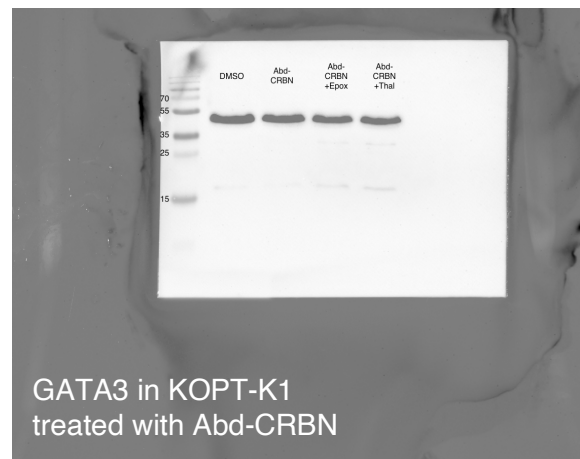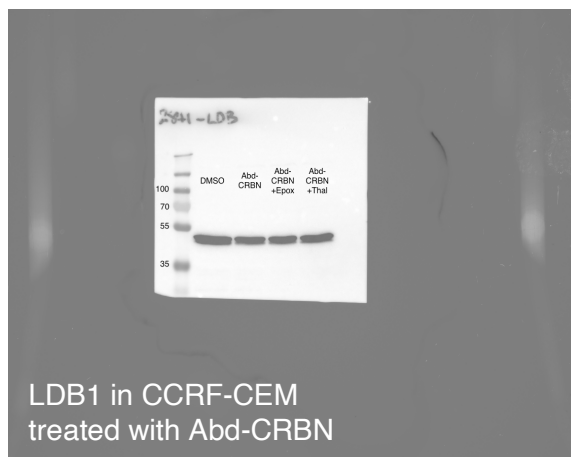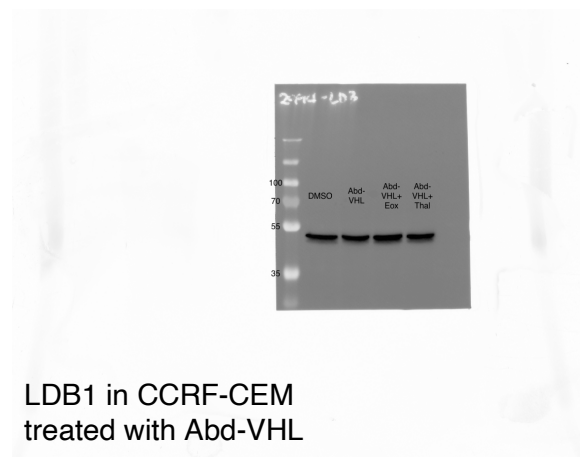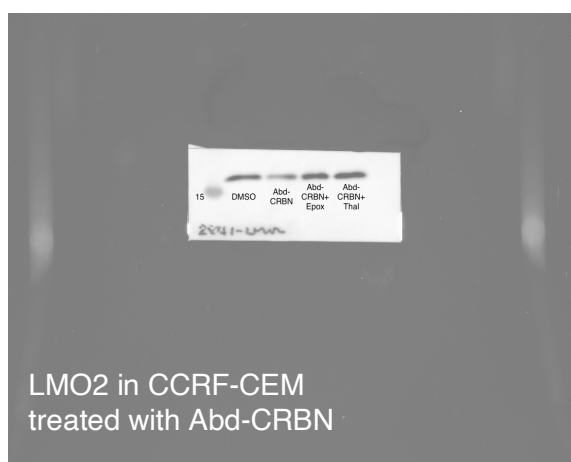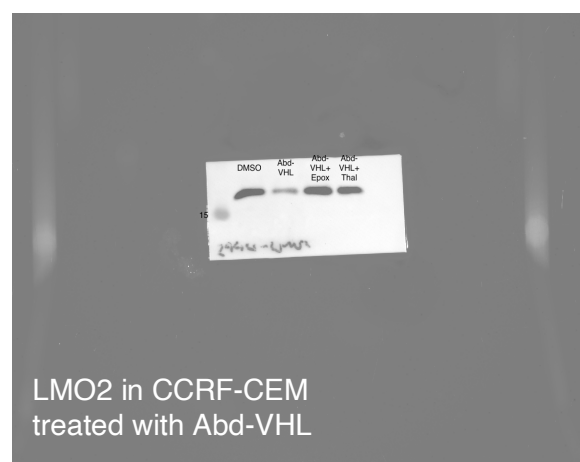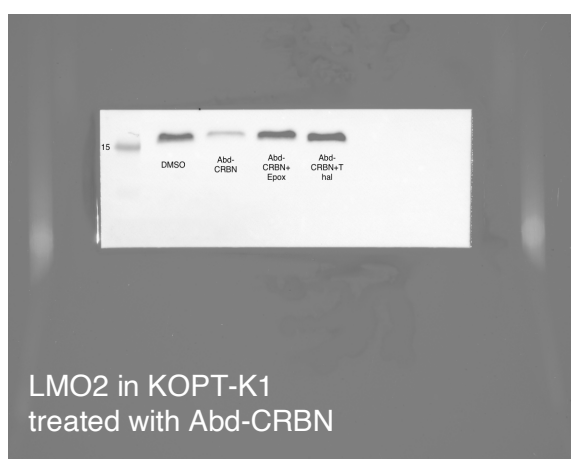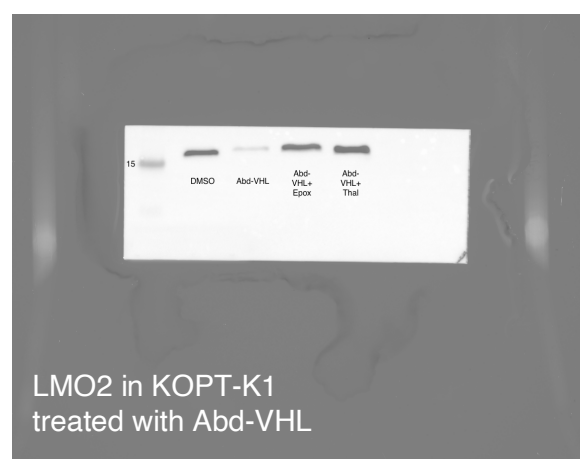

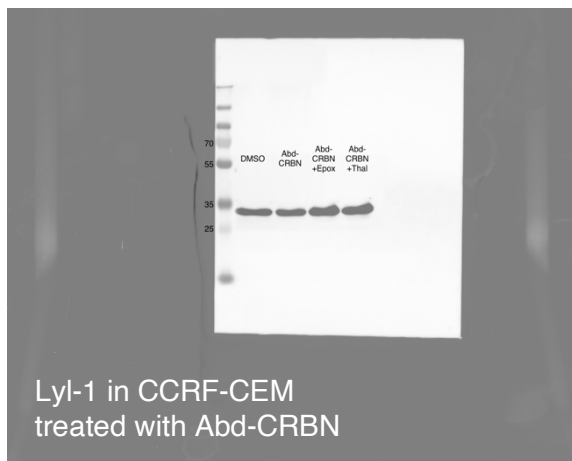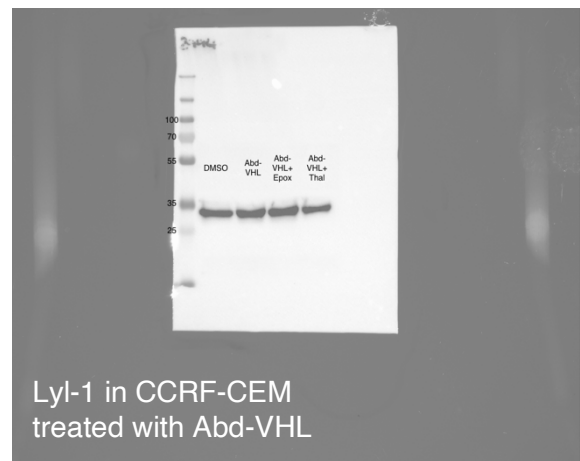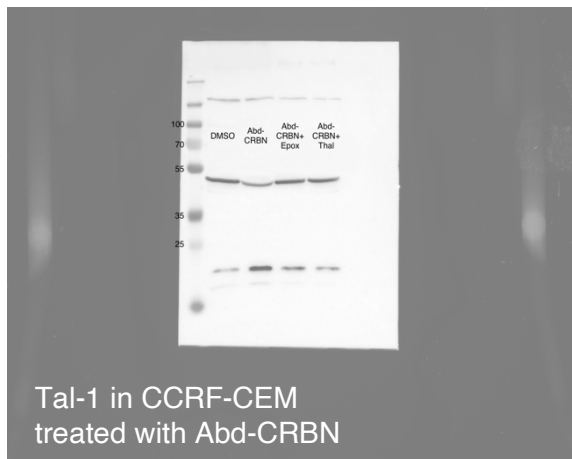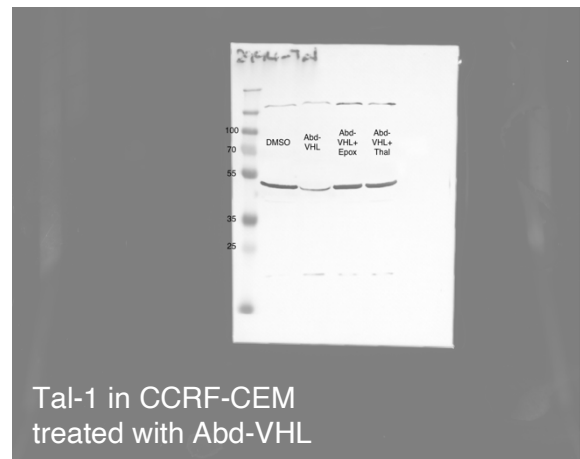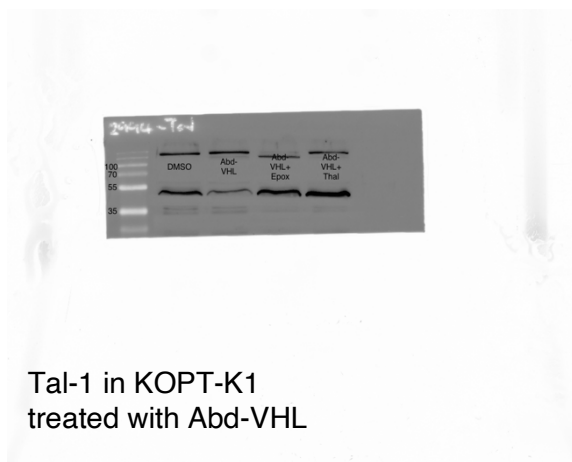

**Figure 3, Source Data 7.** Original membranes corresponding to Figure 3, panel D.

Supplement: fig3-data7 [file Figure 3-source data 7.pdf › Figure 3—source data 7 PDF files containing original western blots for Figure 3D, indicating the relevant bands and treatments./Figure 3-source data 7.pdf]

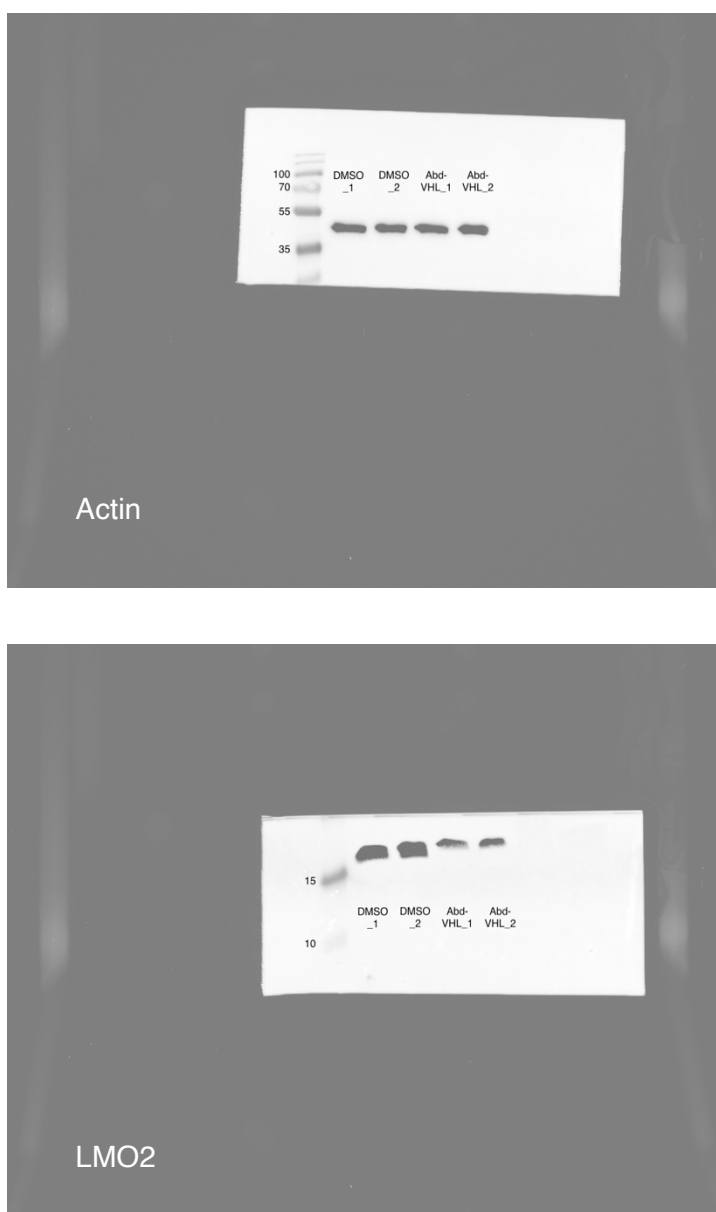

**Figure 5, Source Data 1.** Original membranes corresponding to Figure 5, panel B.

Supplement: fig5-data1 [file Figure 5-source data 1.pdf › Figure 5—source data 1 PDF files containing original western blots for Figure 5B, indicating the relevant bands and treatments./Figure 5-source data 1.pdf]

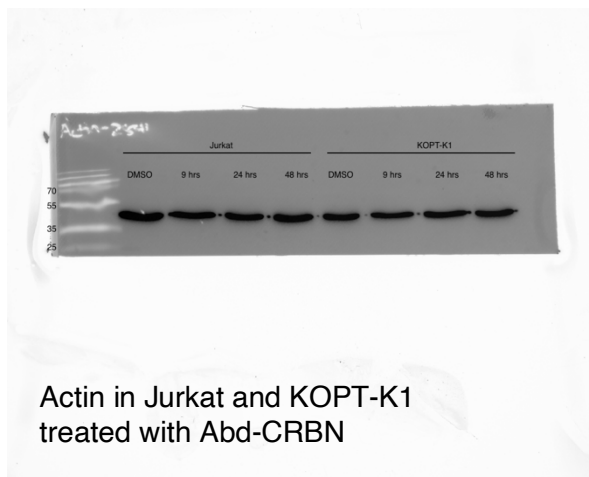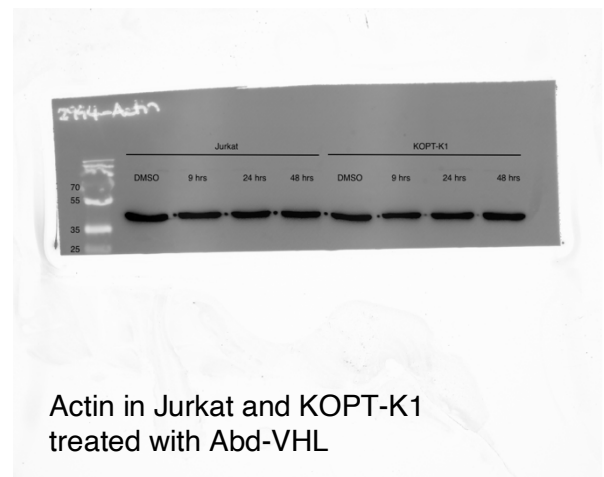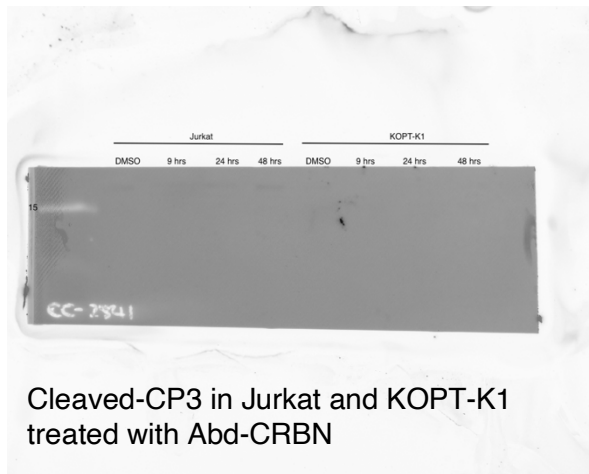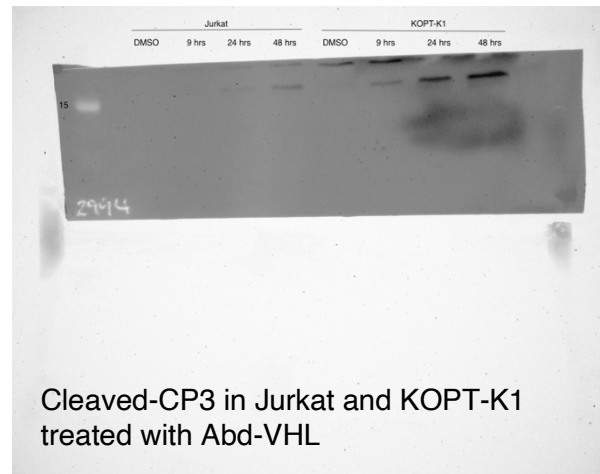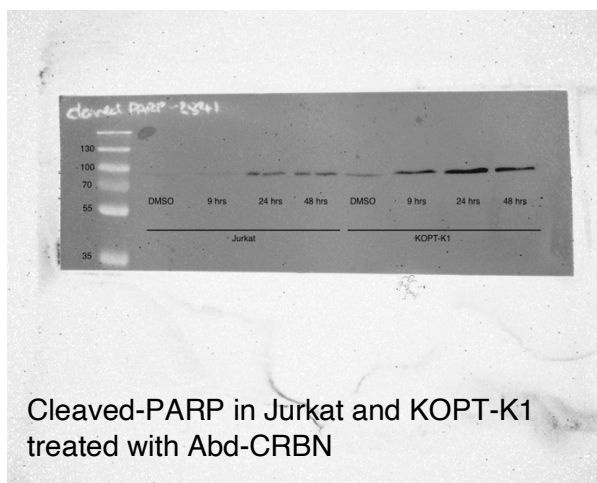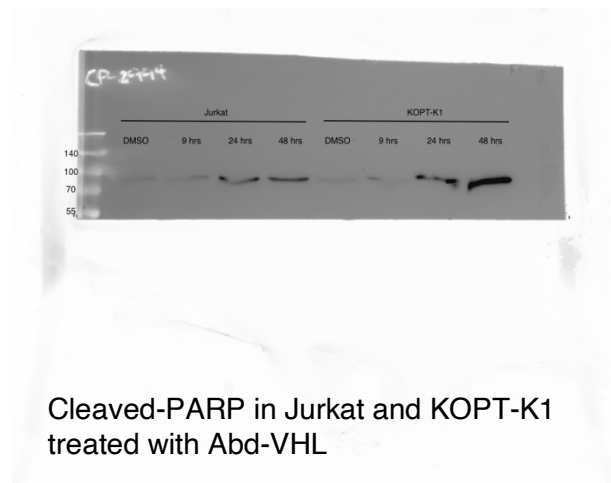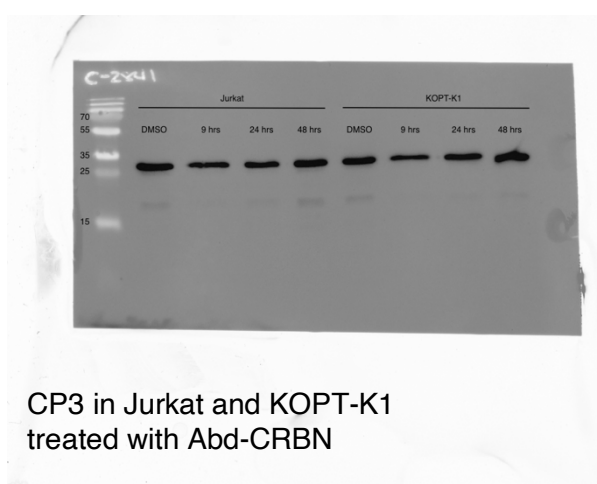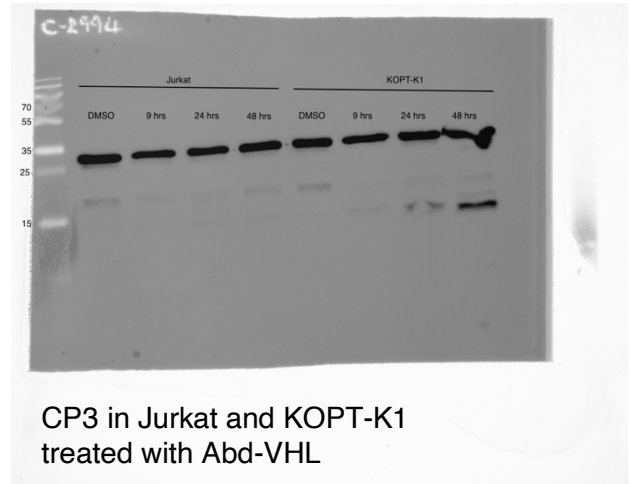

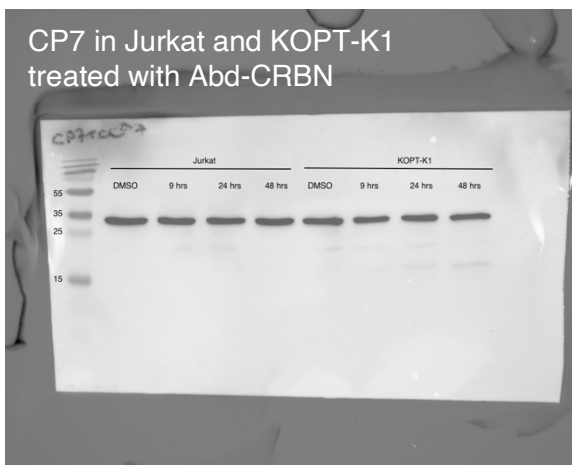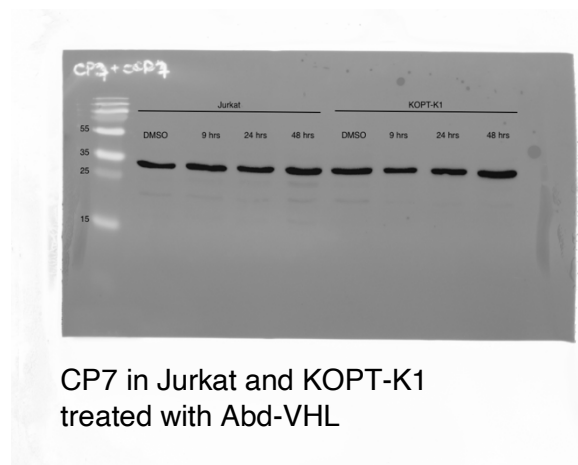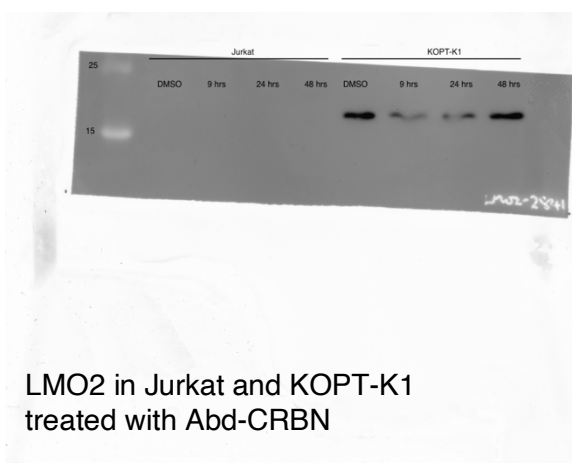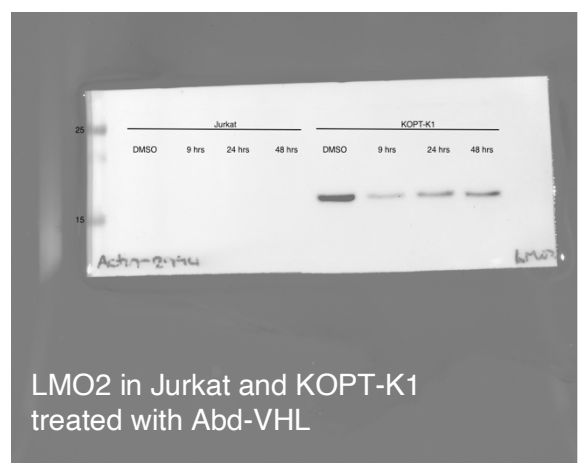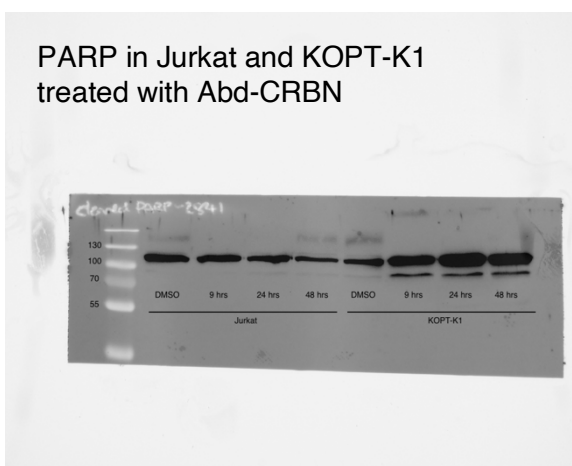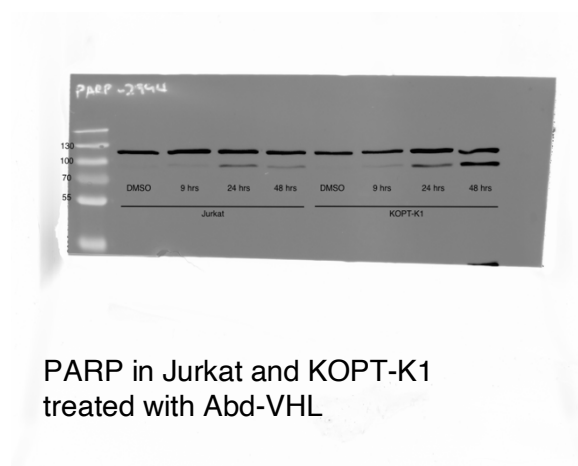

**Figure 6, Source Data 1.** Original membranes corresponding to Figure 6, panel B.

Supplement: fig6-data1 [file Figure 6-source data 1.pdf › Figure 6—source data 1 PDF files containing original western blots for Figure 6B, indicating the relevant bands and treatments./Figure 6-source data 1.pdf]
